# Supplementary material for: Seven New Phenylhexanoids with Antioxidant Activity from Saxifraga umbellulata var. pectinata
Source: MDPI journal article supplement (doi:10.3390/molecules28093928), 2023-05-06
Supplement: s1 [file s1]

A-3-1-1-CD300-H1-2021-9-26, 10. fid

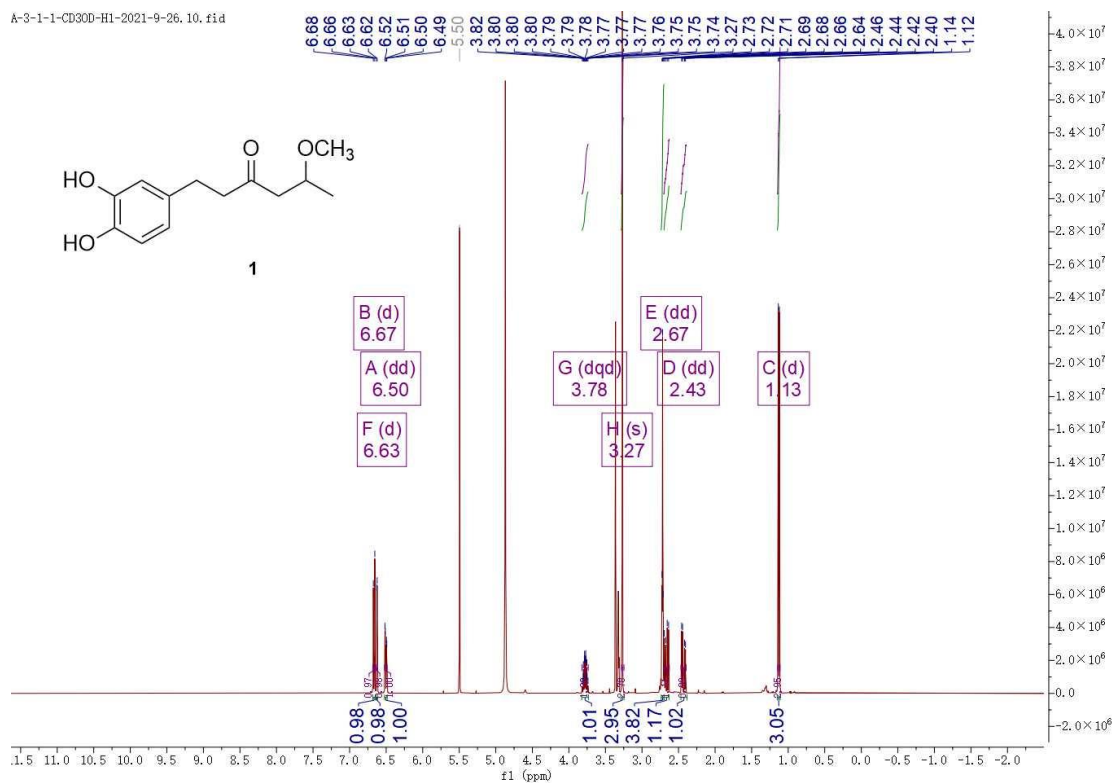

**Figure S1-1.** <sup>1</sup>H-NMR spectrum (400 MHz) of **1** in CD<sub>3</sub>OD

A-3-1-1-CD300-C13-2021-9-26, 10. fid

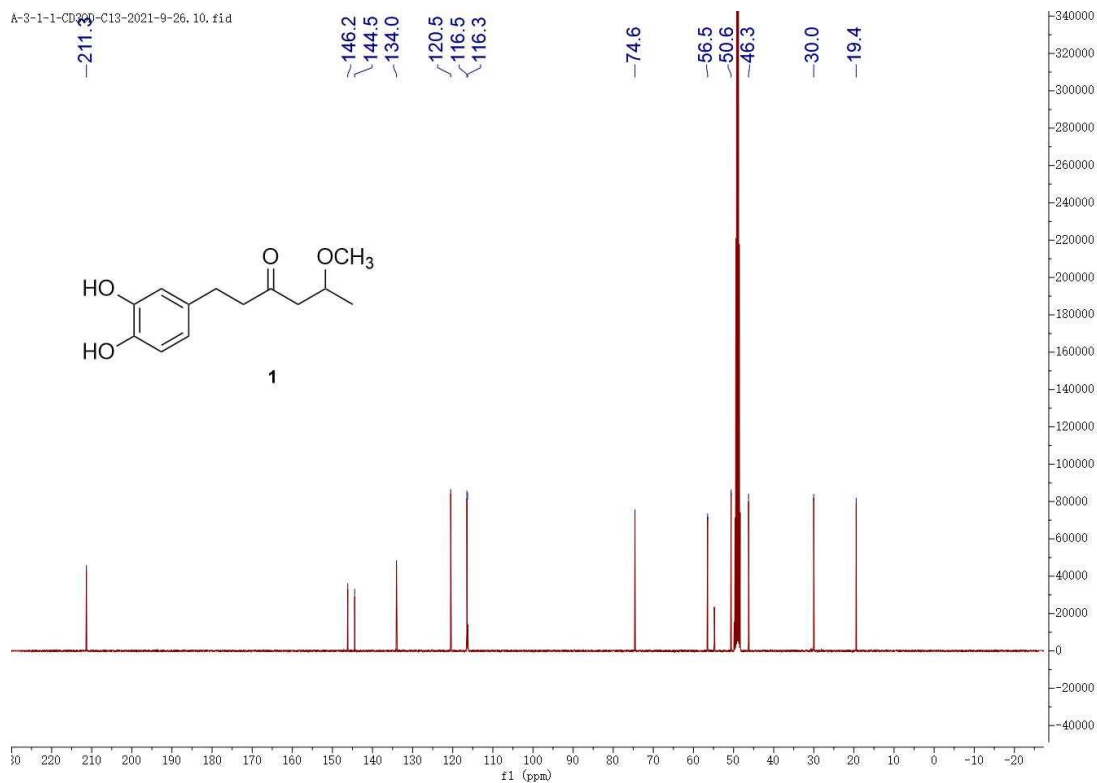

**Figure S1-2.** <sup>13</sup>C-NMR spectrum (100 MHz) of **1** in CD<sub>3</sub>OD

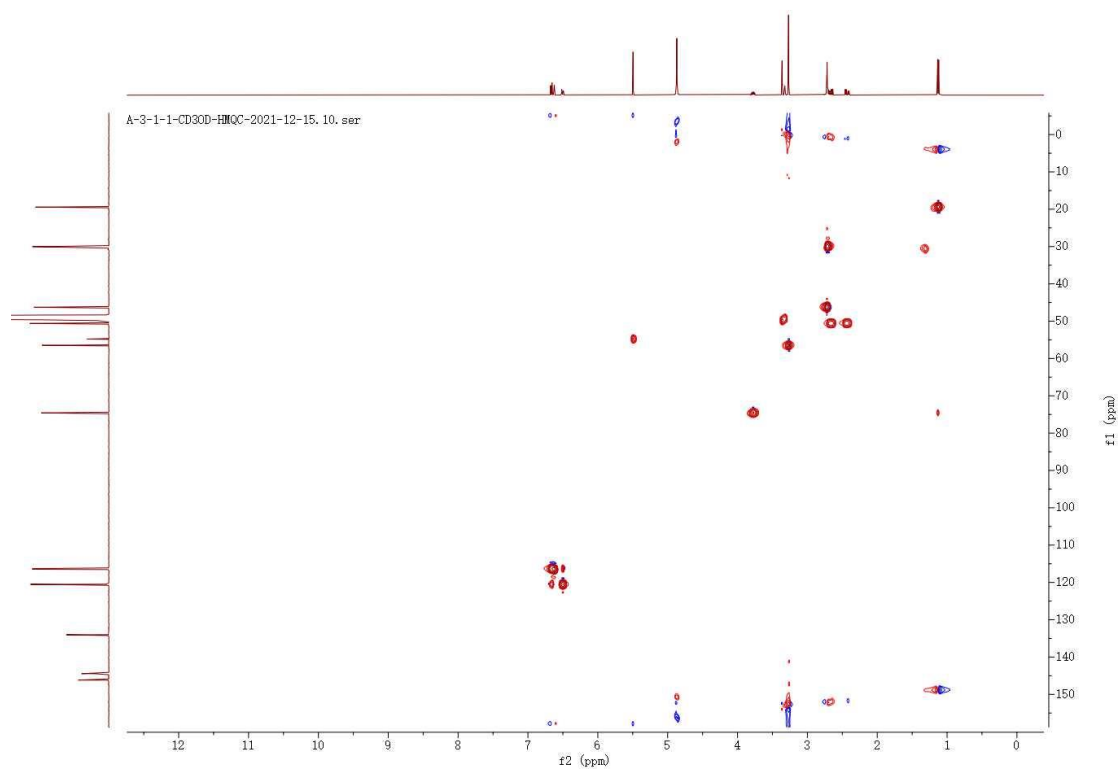

**Figure S1-3.** HMQC spectrum of **1** in CD<sub>3</sub>OD

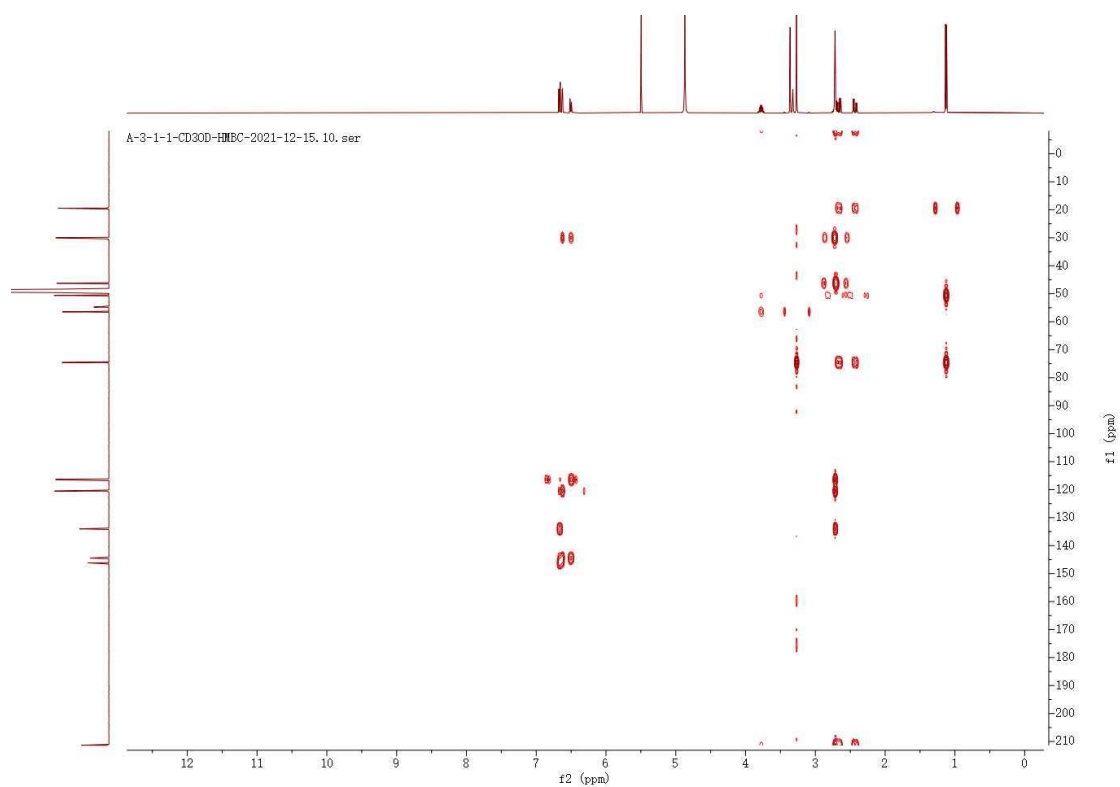

**Figure S1-4.** HMBC spectrum of **1** in CD<sub>3</sub>OD

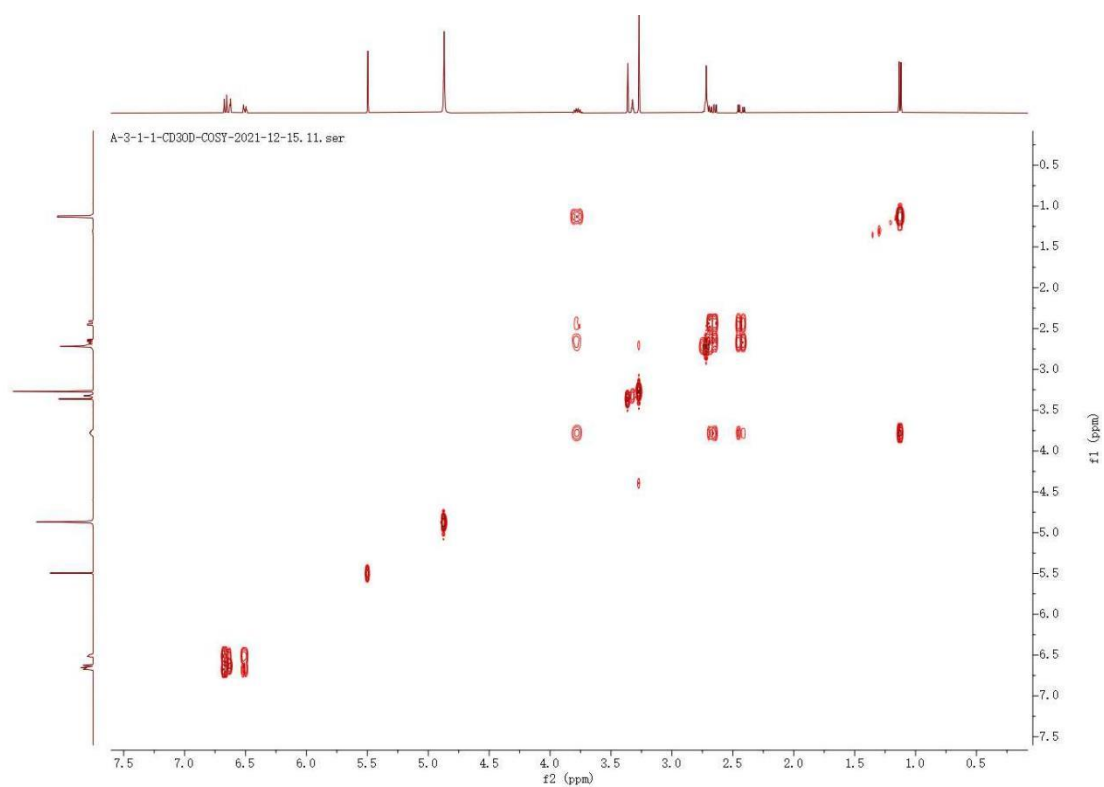

**Figure S1-5.**  $^1\text{H}$ - $^1\text{H}$  COSY spectrum of **1** in  $\text{CD}_3\text{OD}$

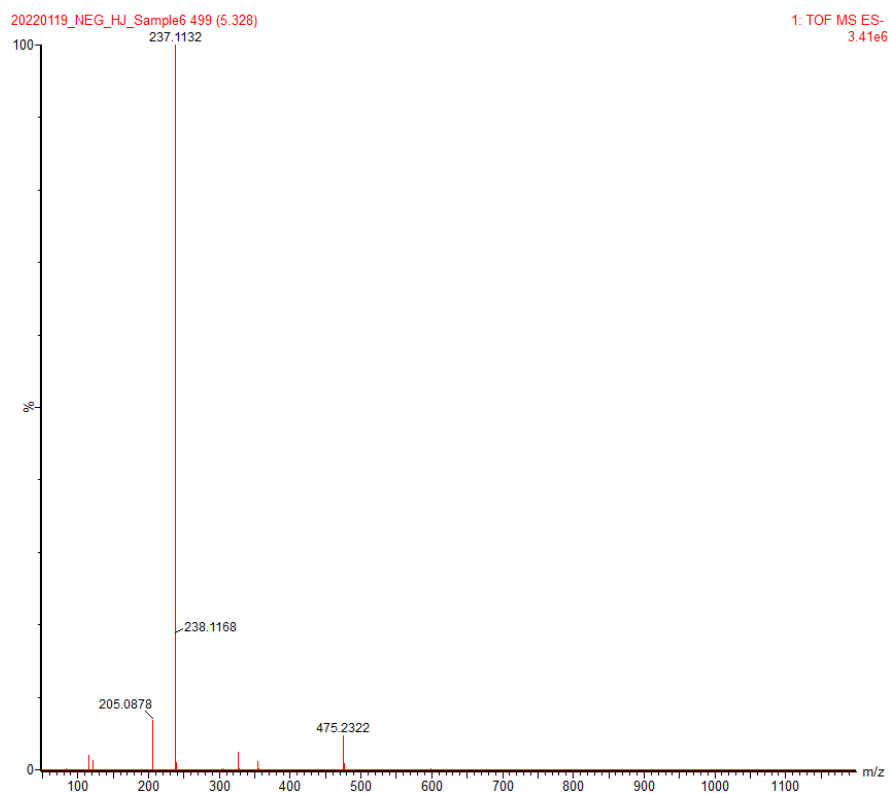

**Figure S1-6.** HR-ESI-MS spectrum of **1**

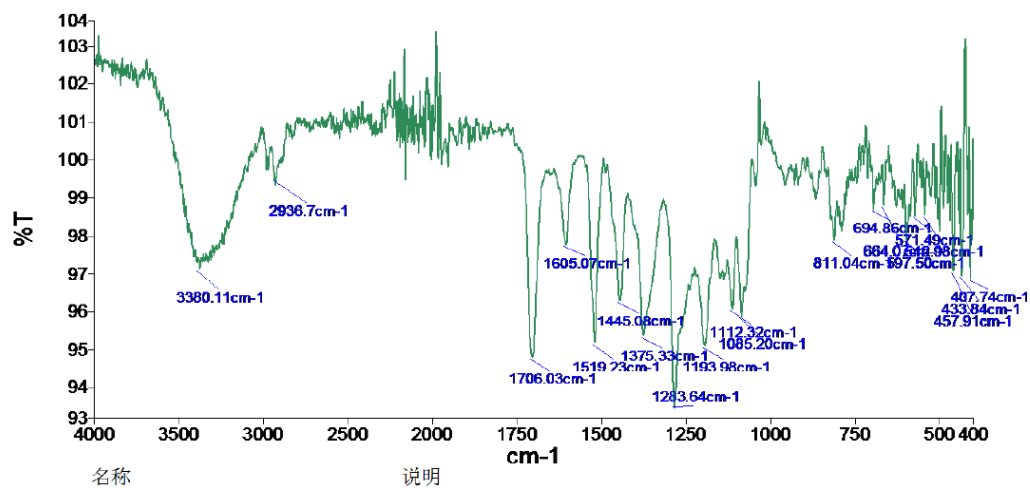

Figure S1-7. IR spectrum of compound 1 (film)

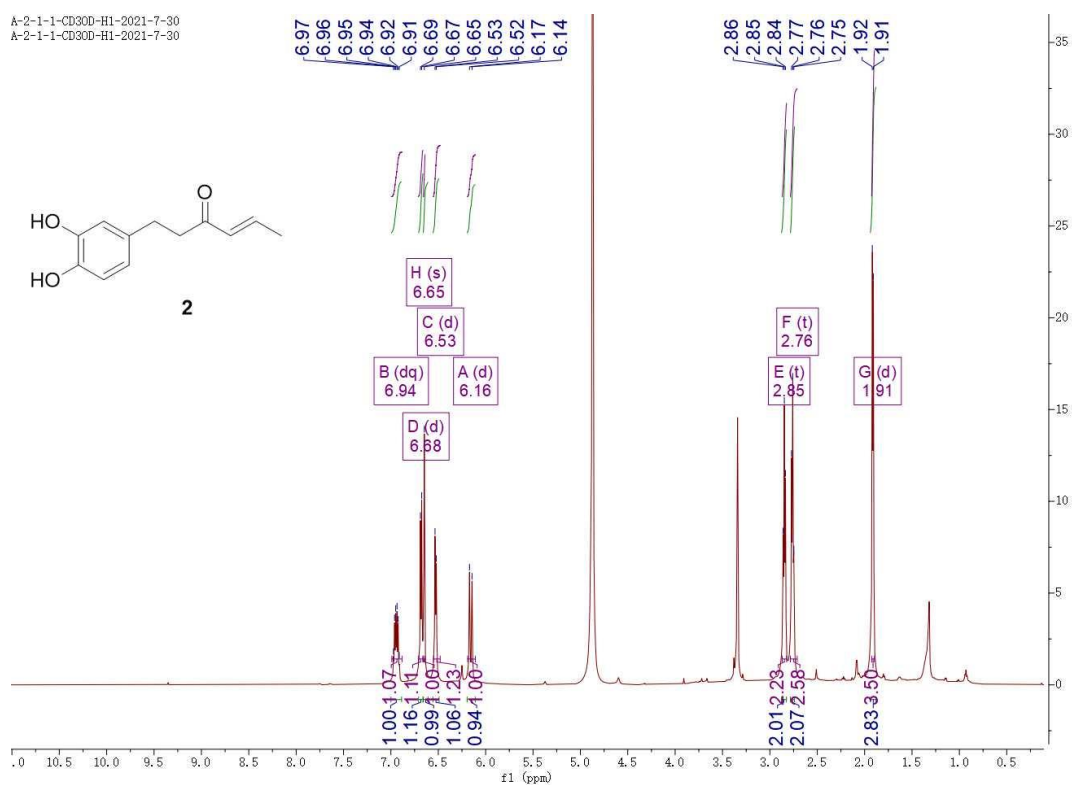

Figure S2-1.  $^1\text{H}$ -NMR spectrum (400 MHz) of 2 in  $\text{CD}_3\text{OD}$

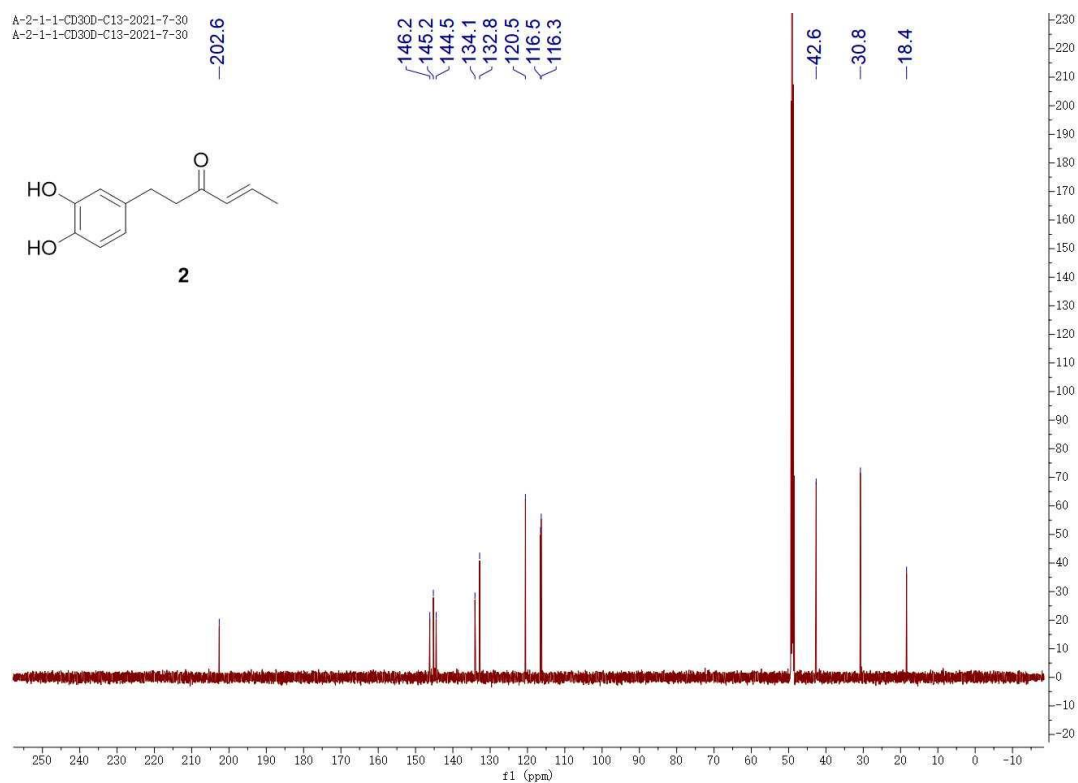

**Figure S2-2.** <sup>13</sup>C-NMR spectrum (100 MHz) of **2** in CD<sub>3</sub>OD

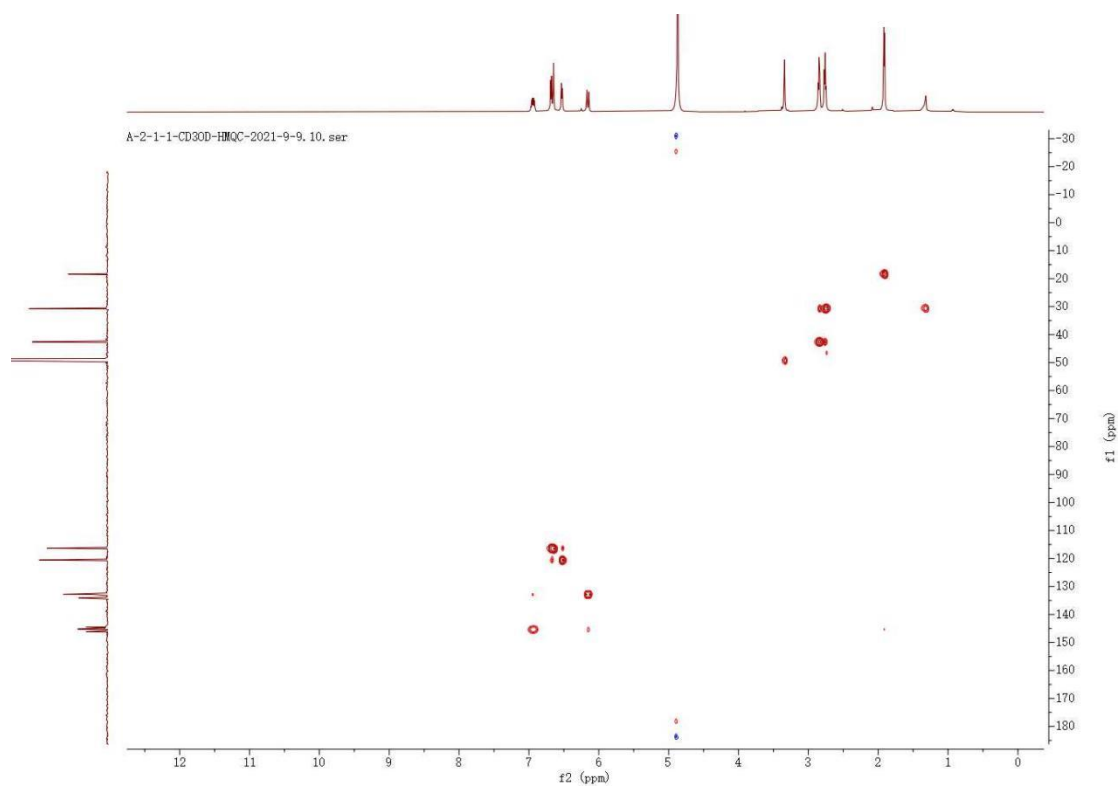

**Figure S2-3.** HMQC spectrum of **2** in CD<sub>3</sub>OD

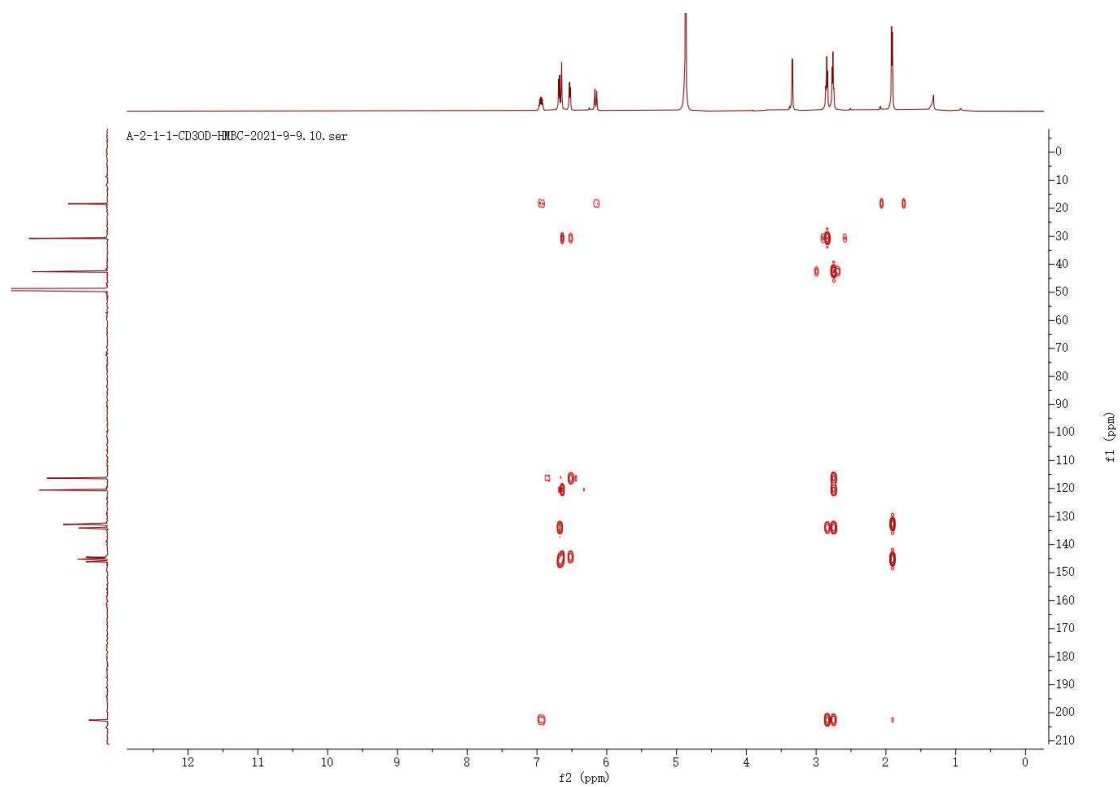

**Figure S2-4.** HMBC spectrum of **2** in CD<sub>3</sub>OD

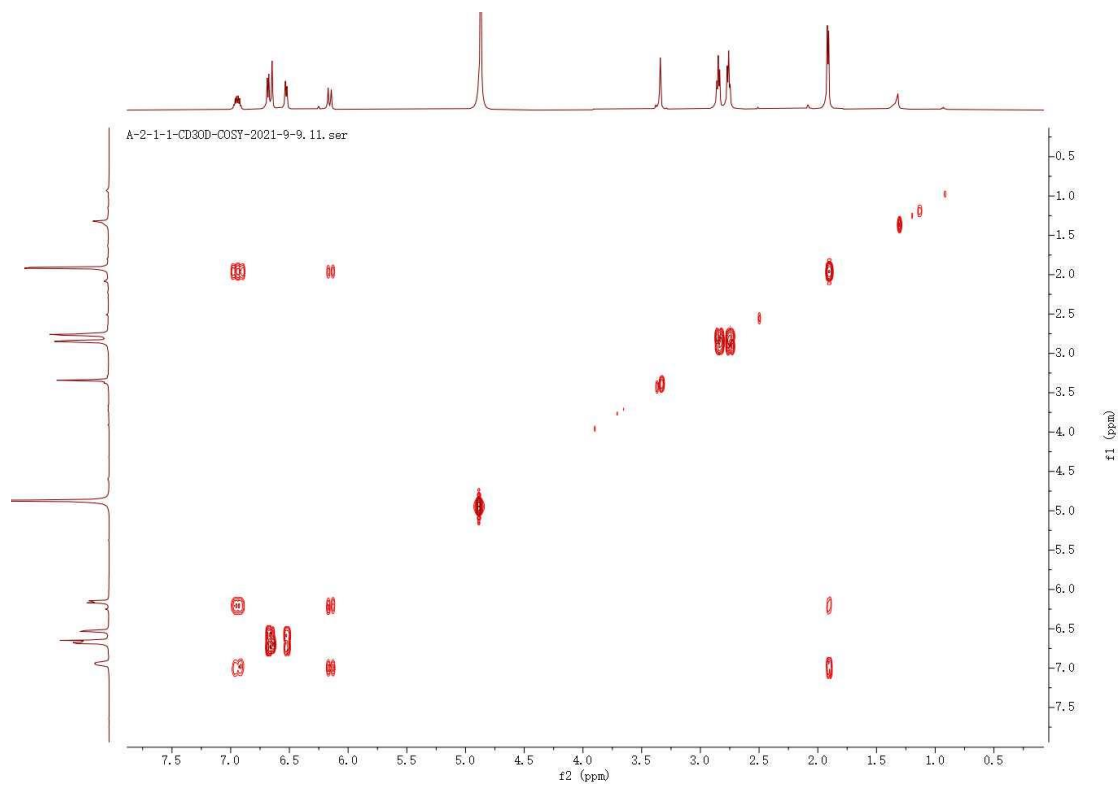

**Figure S2-5.** <sup>1</sup>H-<sup>1</sup>H COSY spectrum of **2** in CD<sub>3</sub>OD

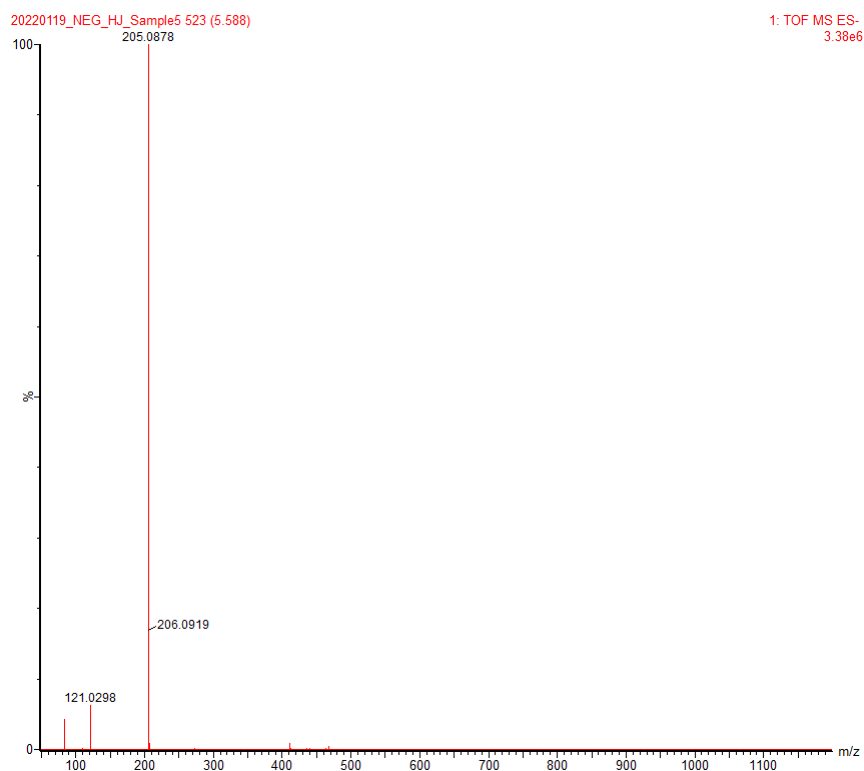

**Figure S2-6.** HR-ESI-MS spectrum of **2**

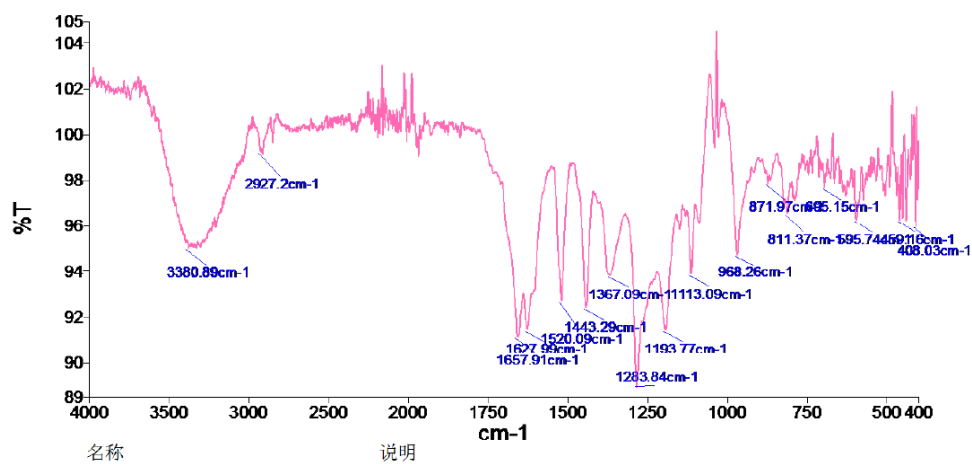

**Figure S2-7.** IR spectrum of compound **2** (film)

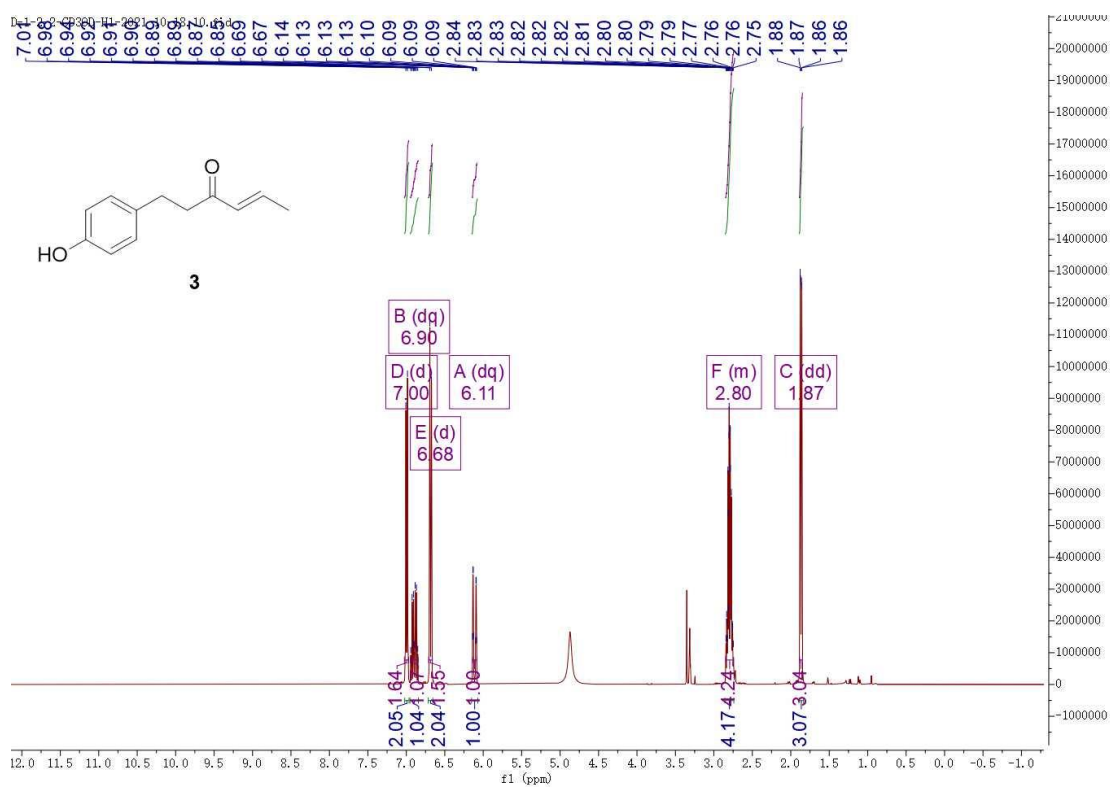

**Figure S3-1.** <sup>1</sup>H-NMR spectrum (400 MHz) of **3** in CD<sub>3</sub>OD

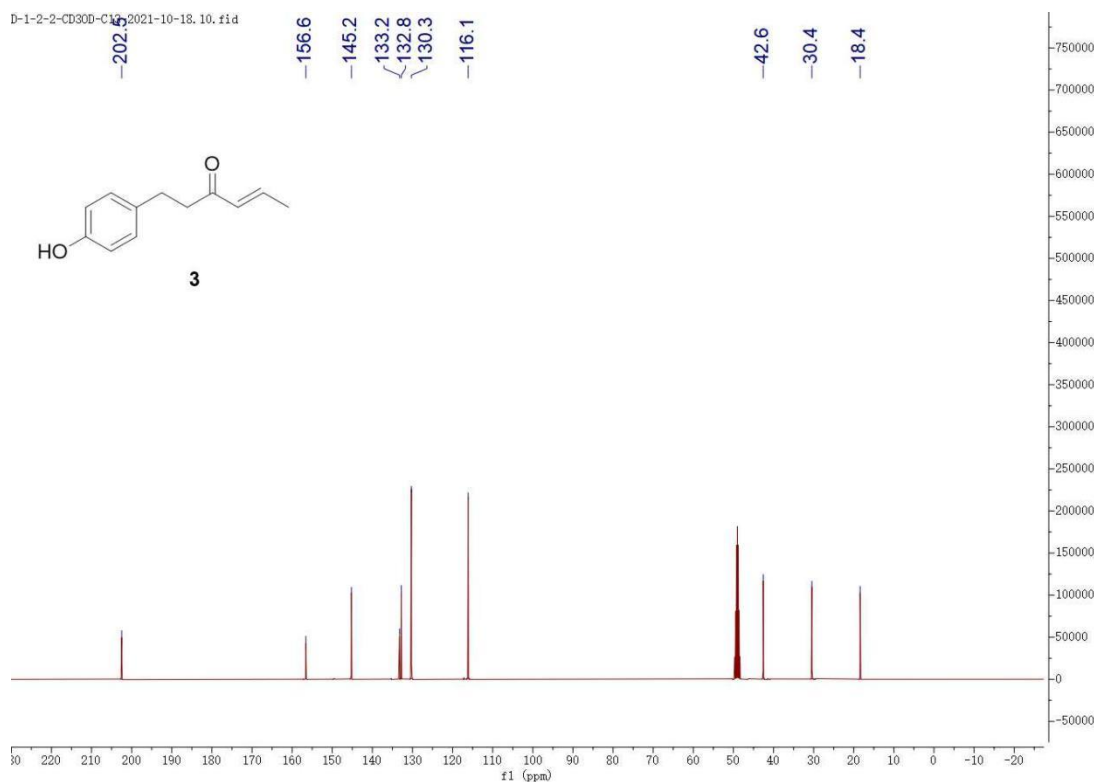

**Figure S3-2.** <sup>13</sup>C-NMR spectrum (100 MHz) of **3** in CD<sub>3</sub>OD



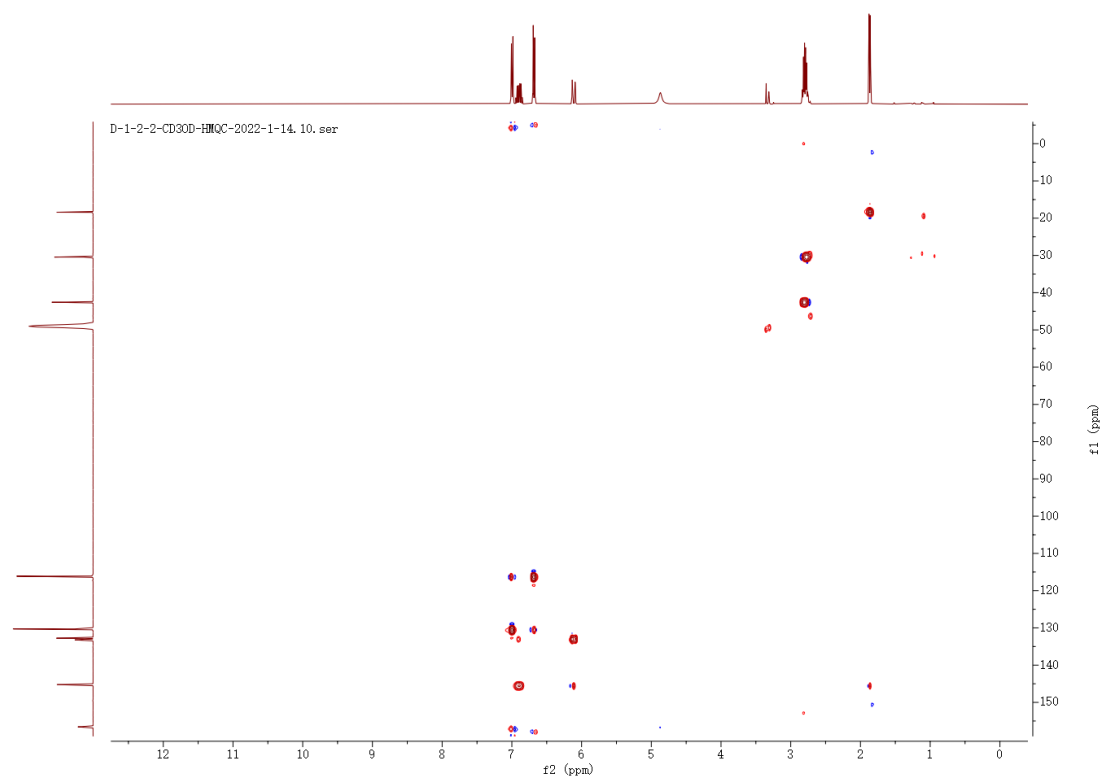

**Figure S3-3.** HMQC spectrum of **3** in CD<sub>3</sub>OD

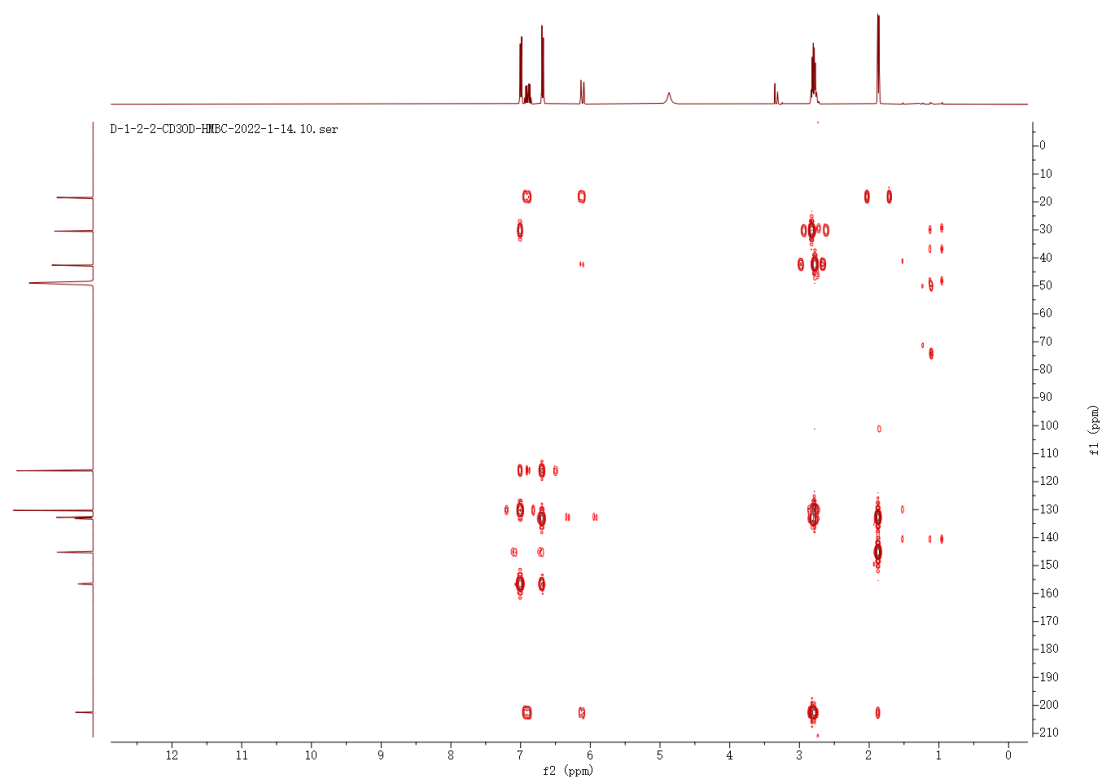

**Figure S3-4.** HMBC spectrum of **3** in CD<sub>3</sub>OD

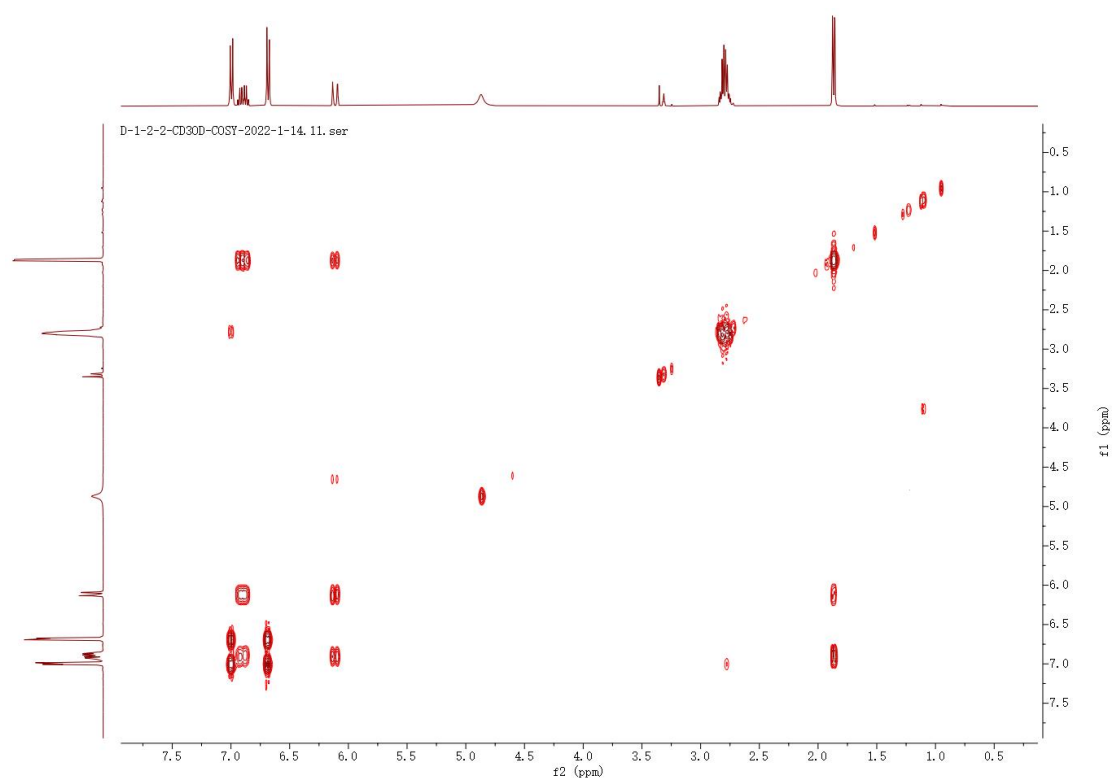

**Figure S3-5.**  $^1\text{H}$ - $^1\text{H}$  COSY spectrum of **3** in  $\text{CD}_3\text{OD}$

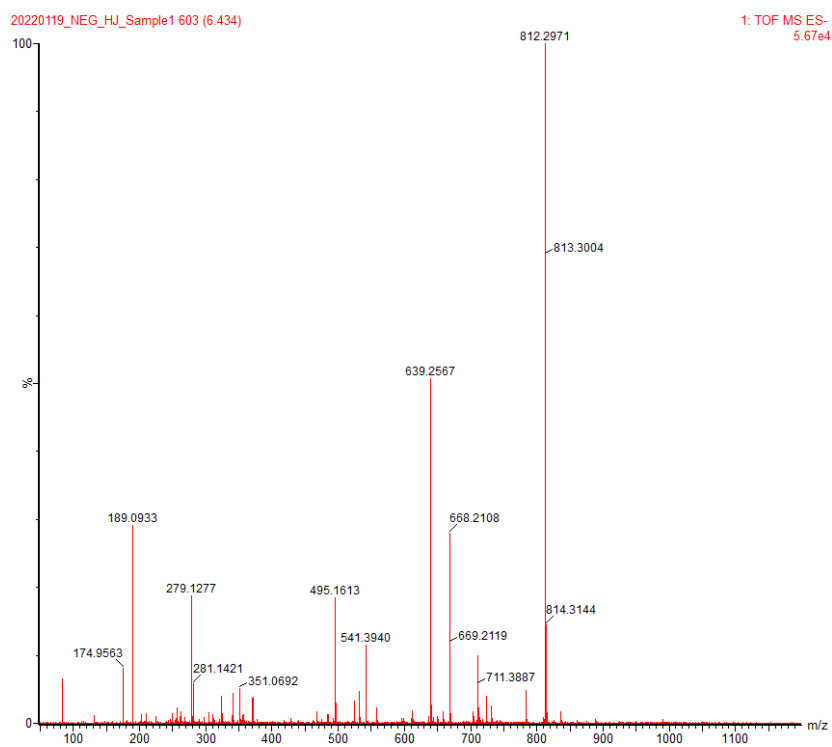

**Figure S3-6.** HR-ESI-MS spectrum of **3**

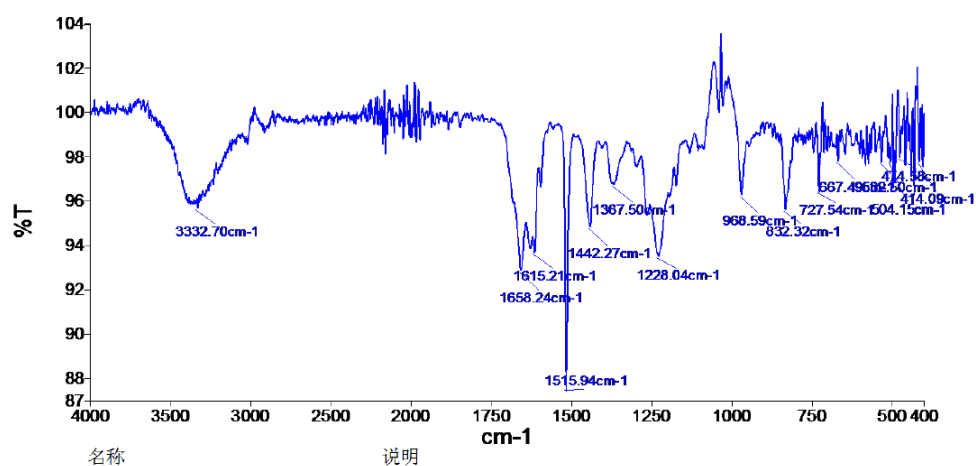

Figure S3-7. IR spectrum of compound 3 (film)

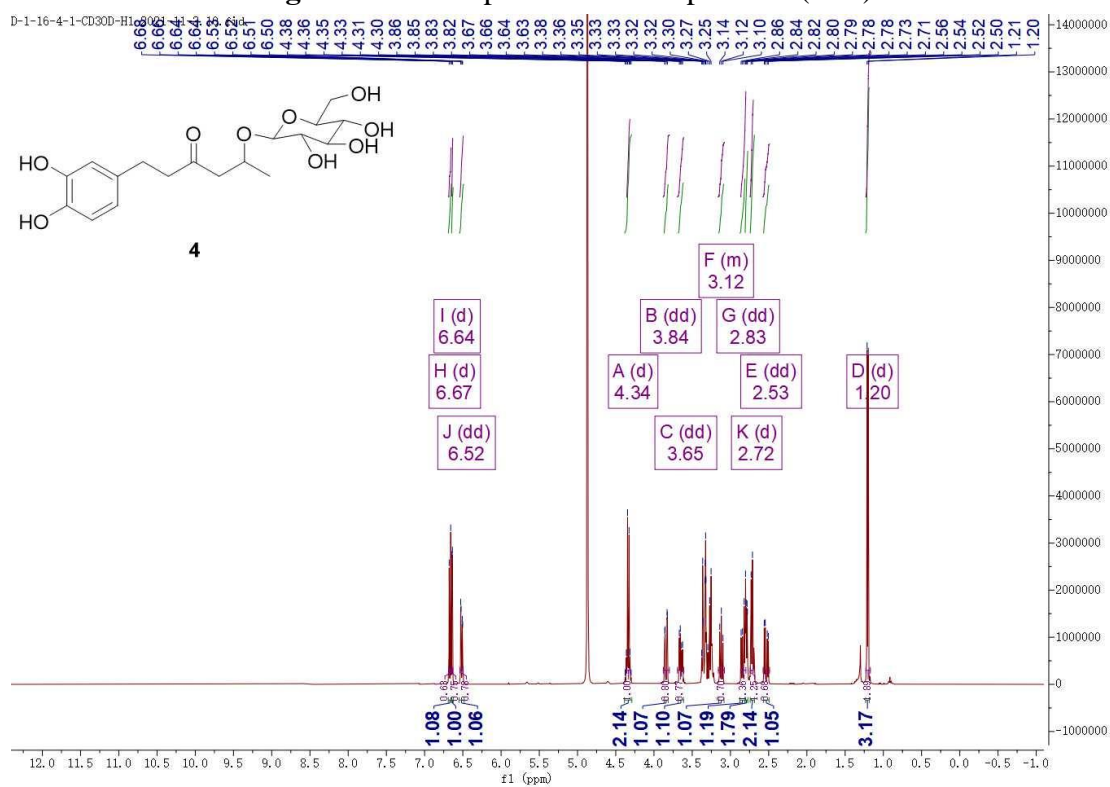

Figure S4-1.  $^1\text{H}$ -NMR spectrum (400 MHz) of 4 in  $\text{CD}_3\text{OD}$

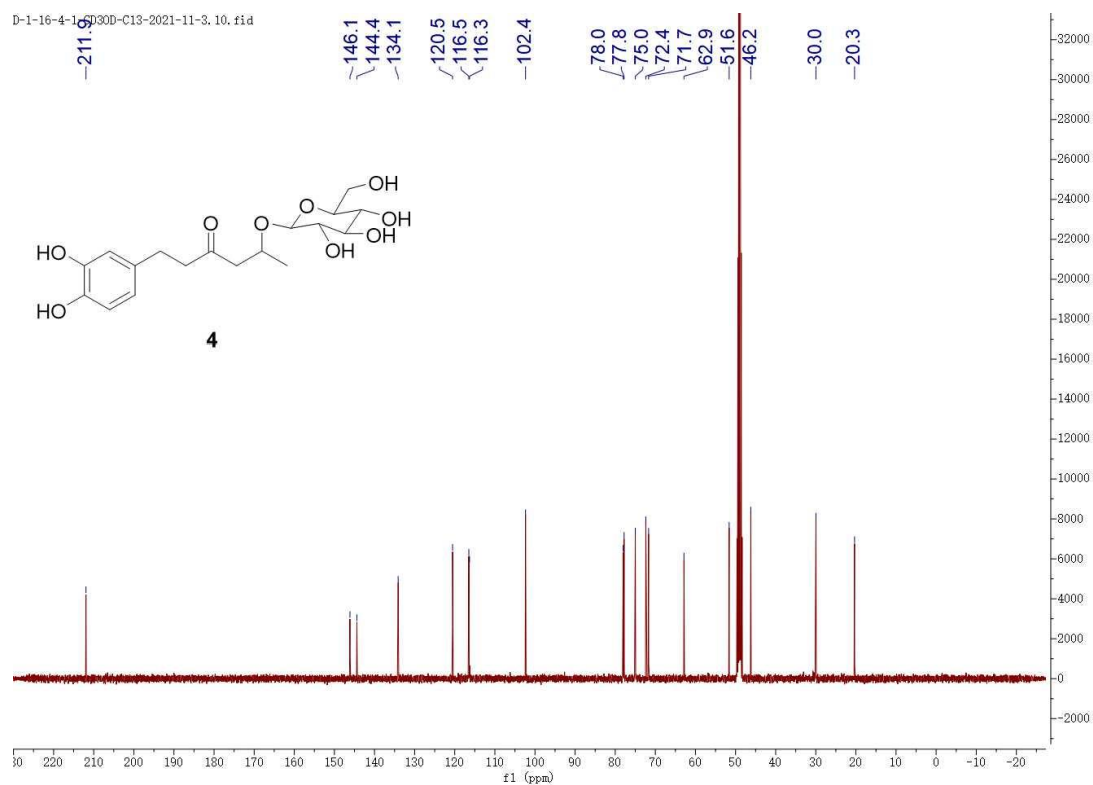

**Figure S4-2.**  $^{13}\text{C}$ -NMR spectrum (100 MHz) of **4** in  $\text{CD}_3\text{OD}$

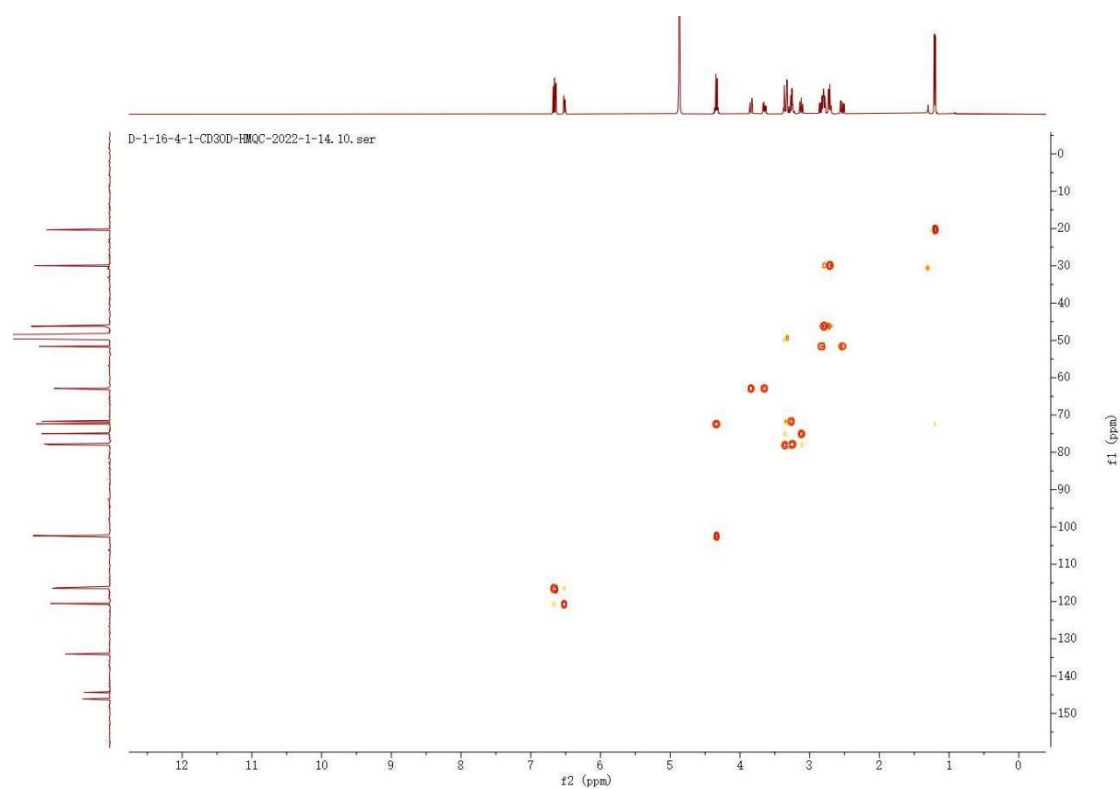

**Figure S4-3.** HMQC spectrum of **4** in  $\text{CD}_3\text{OD}$

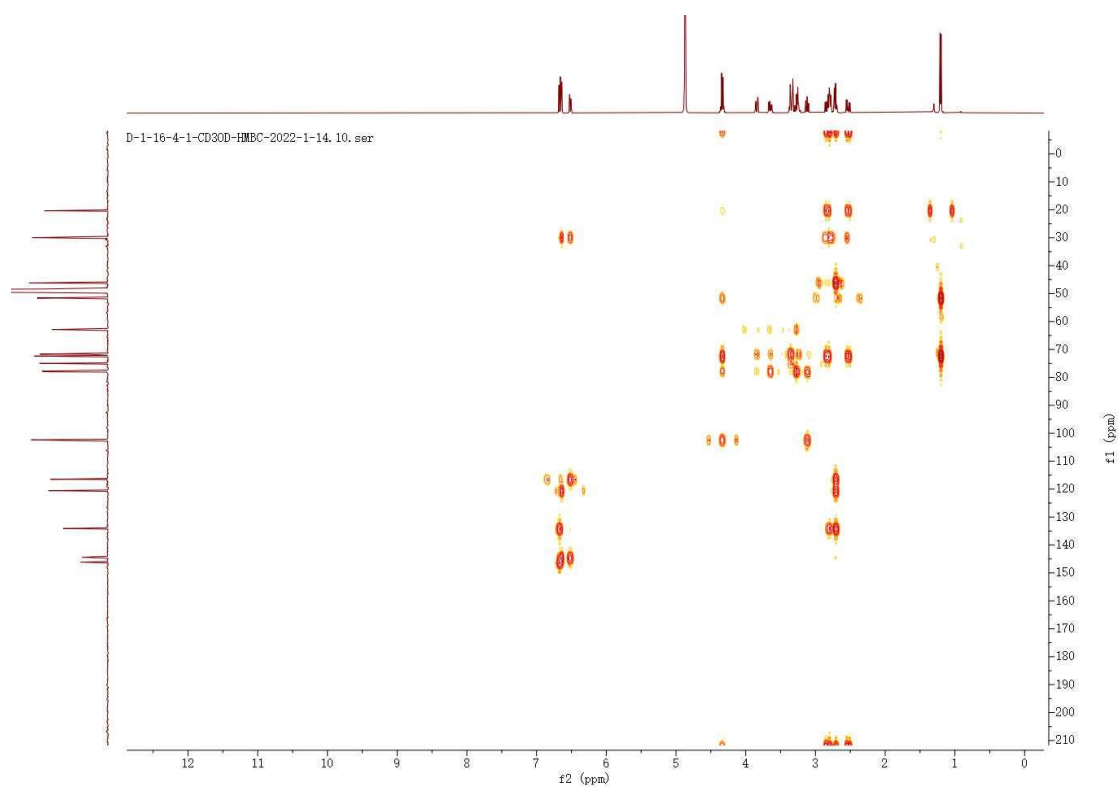

**Figure S4-4.** HMBC spectrum of **4** in CD<sub>3</sub>OD

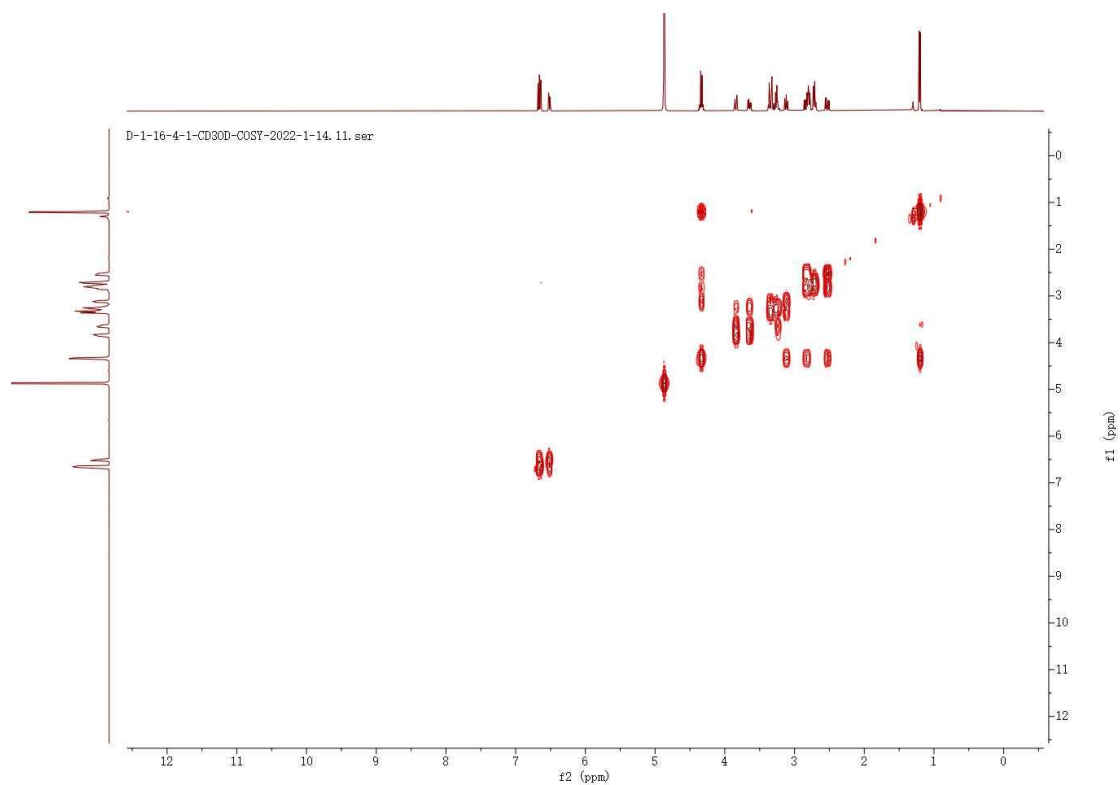

**Figure S4-5.** <sup>1</sup>H-<sup>1</sup>H COSY spectrum of **4** in CD<sub>3</sub>OD

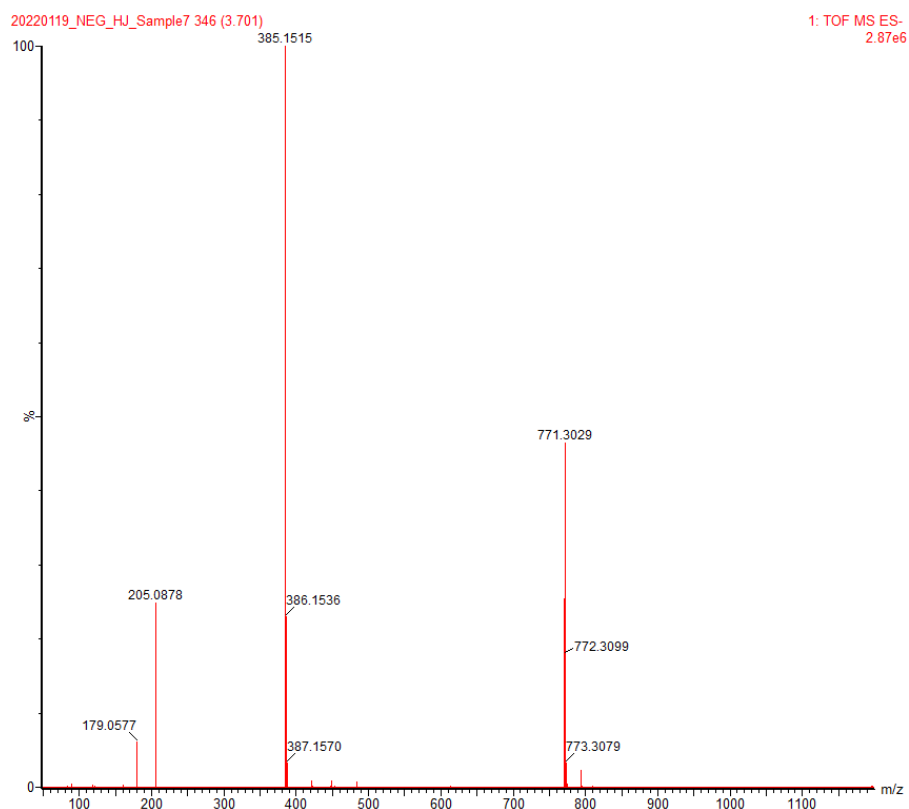

Figure S4-6. HR-ESI-MS spectrum of **4**

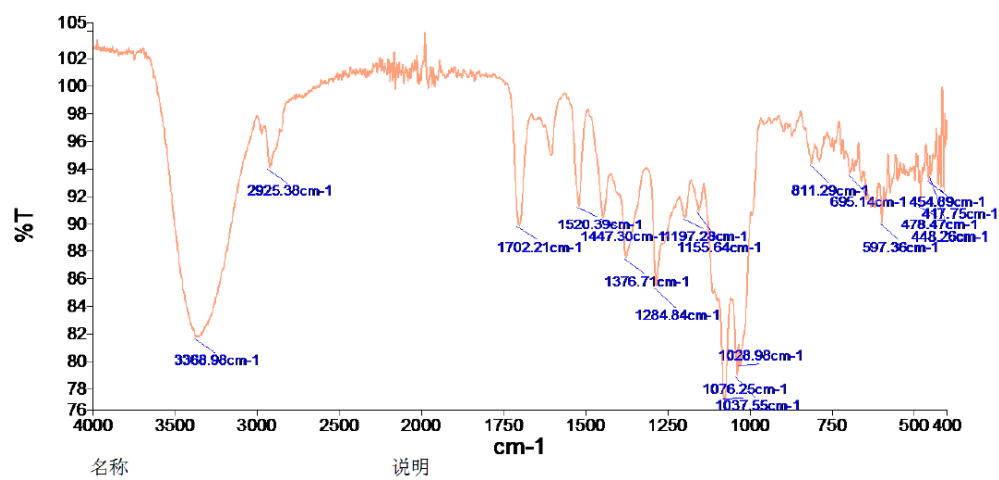

Figure S4-7. IR spectrum of compound **4** (film)

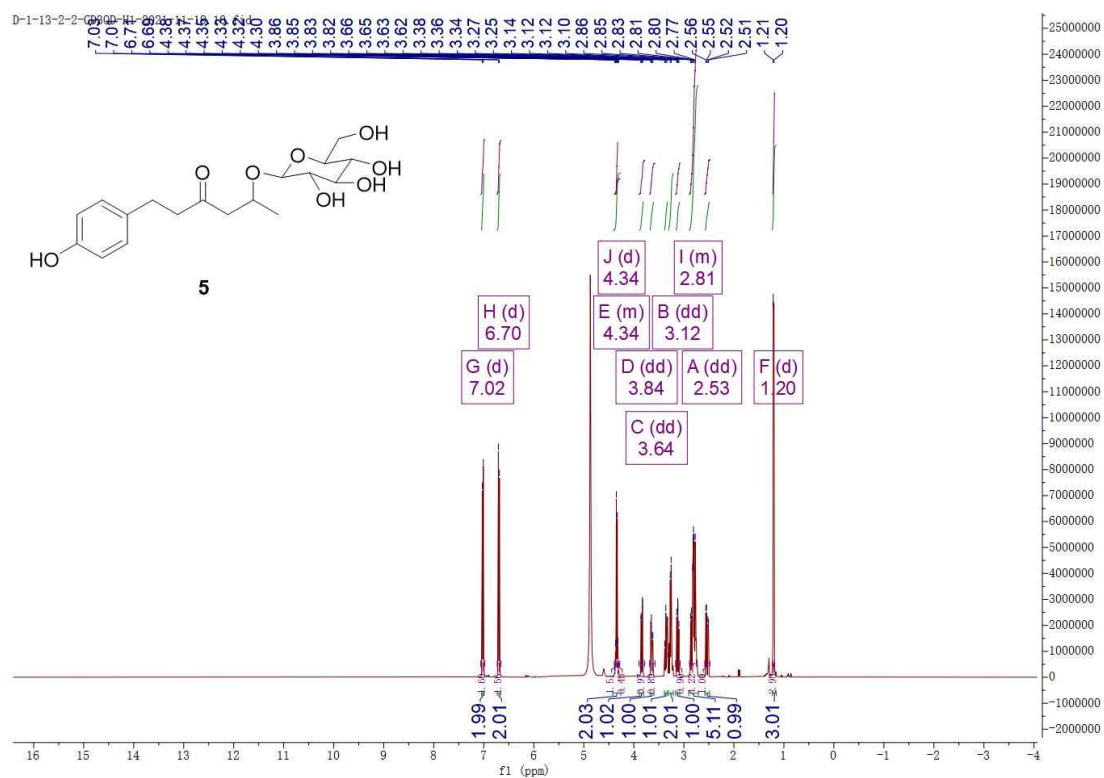

**Figure S5-1.** <sup>1</sup>H-NMR spectrum (400 MHz) of **5** in CD<sub>3</sub>OD

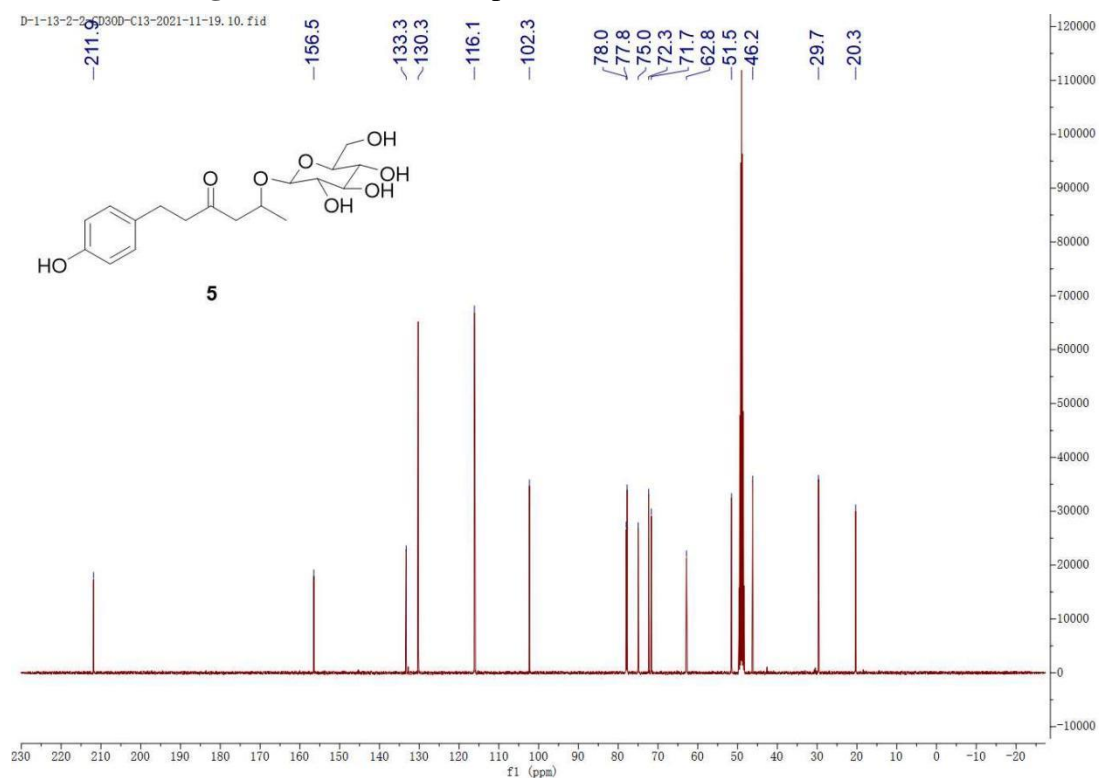

**Figure S5-2.** <sup>13</sup>C-NMR spectrum (100 MHz) of **5** in CD<sub>3</sub>OD

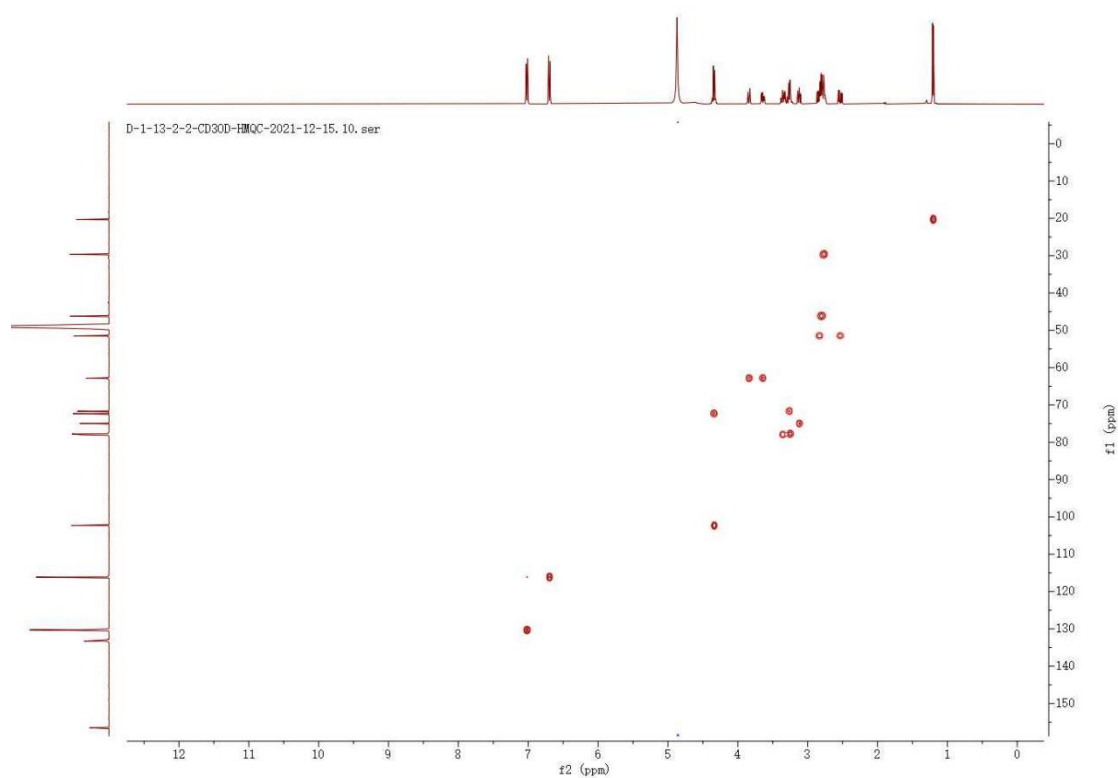

**Figure S5-3.** HMQC spectrum of **5** in CD<sub>3</sub>OD

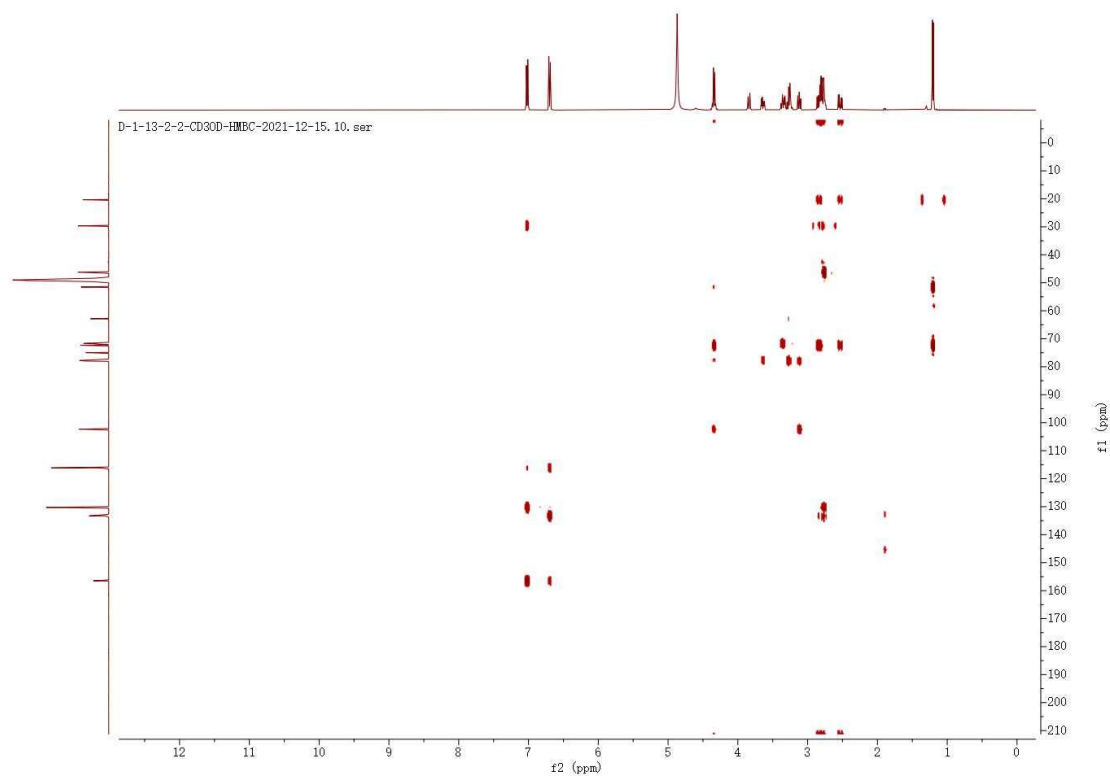

**Figure S5-4.** HMBC spectrum of **5** in CD<sub>3</sub>OD



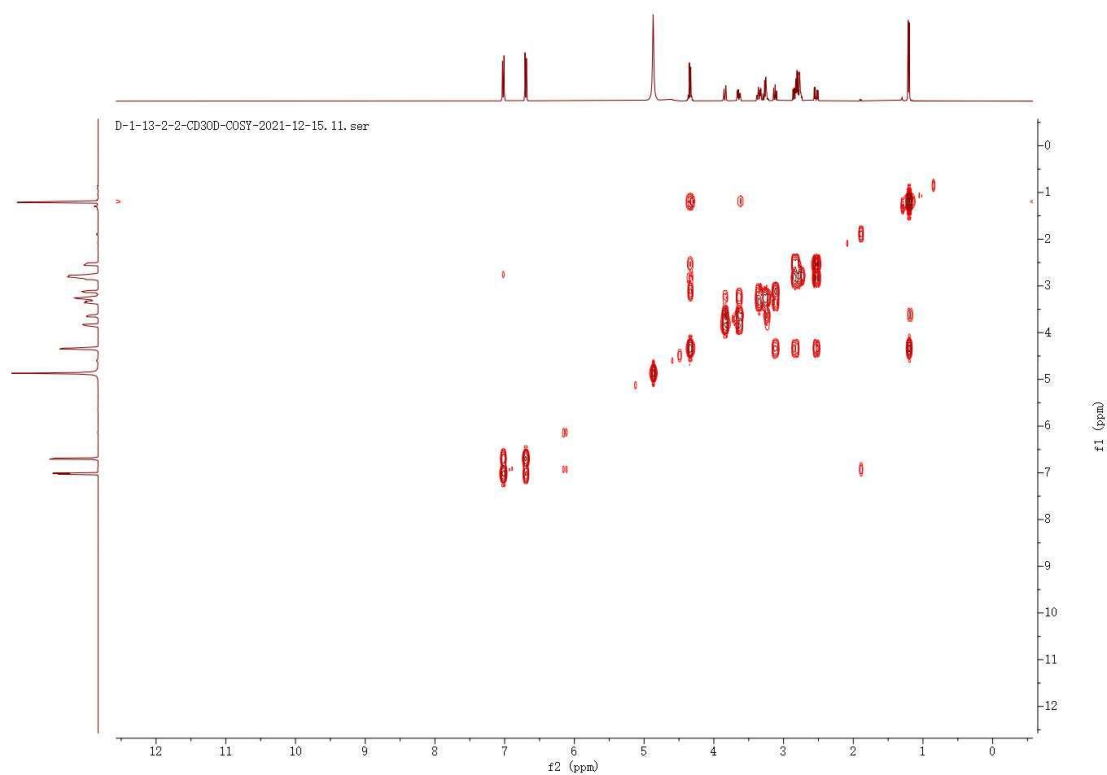

**Figure S5-5.**  $^1\text{H}$ - $^1\text{H}$  COSY spectrum of **5** in  $\text{CD}_3\text{OD}$

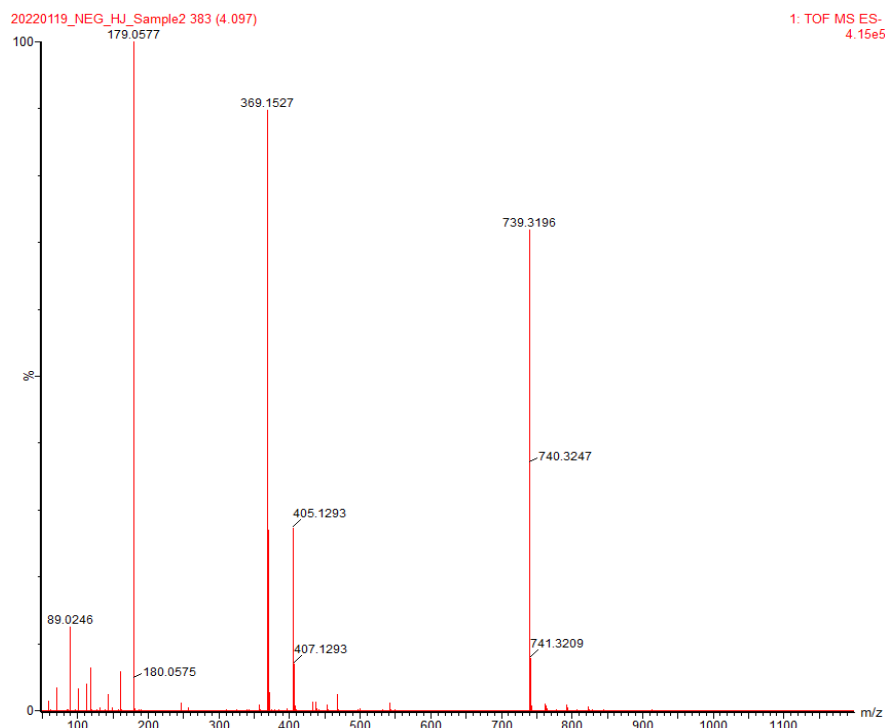

**Figure S5-6.** HR-ESI-MS spectrum of **5**

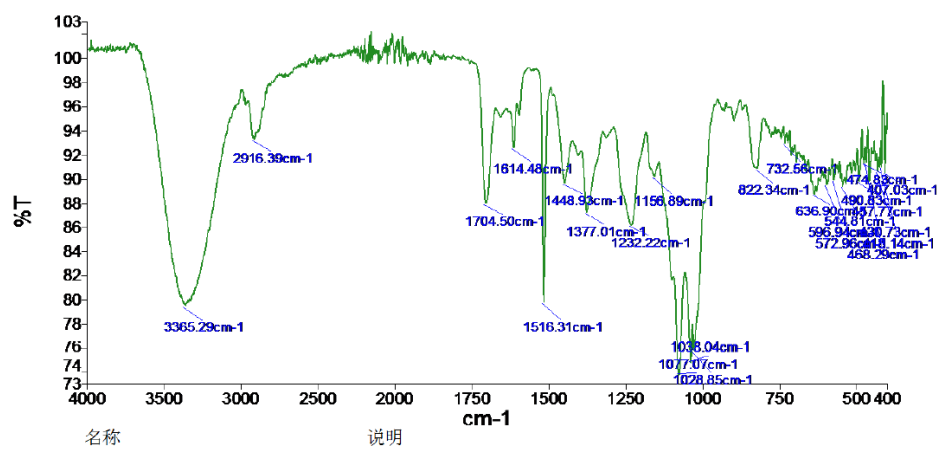

Figure S5-7. IR spectrum of compound **5** (film)

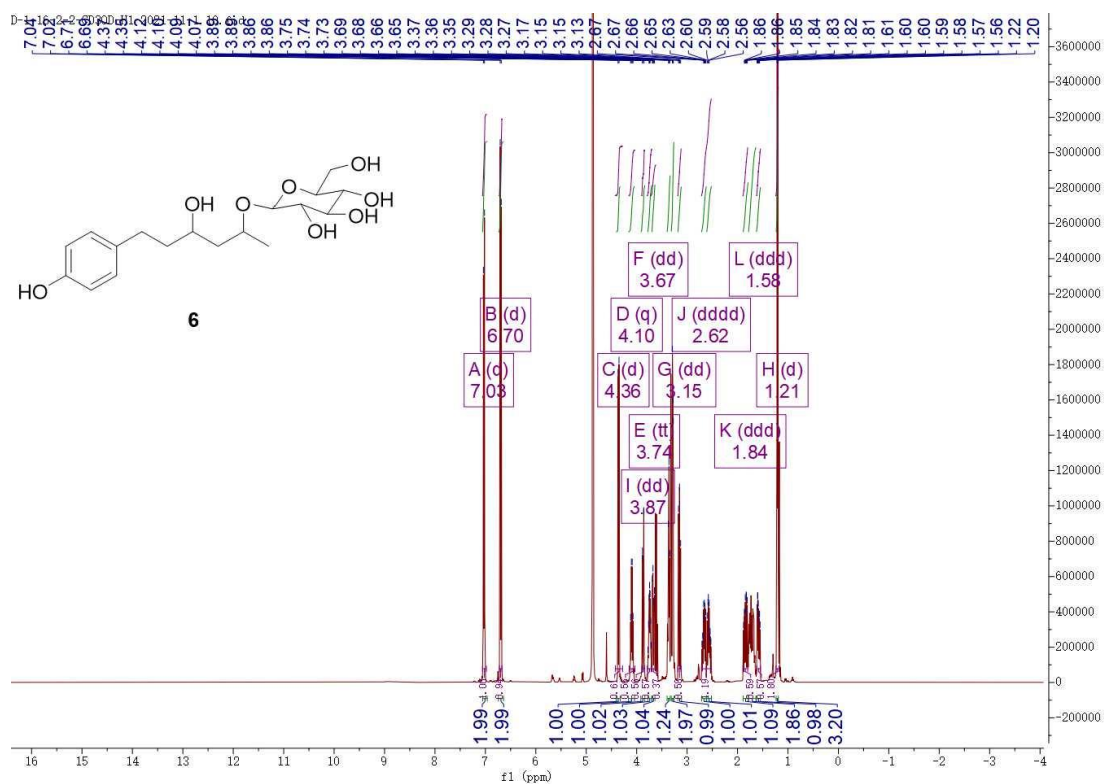

Figure S6-1.  $^1\text{H}$ -NMR spectrum (400 MHz) of **6** in  $\text{CD}_3\text{OD}$

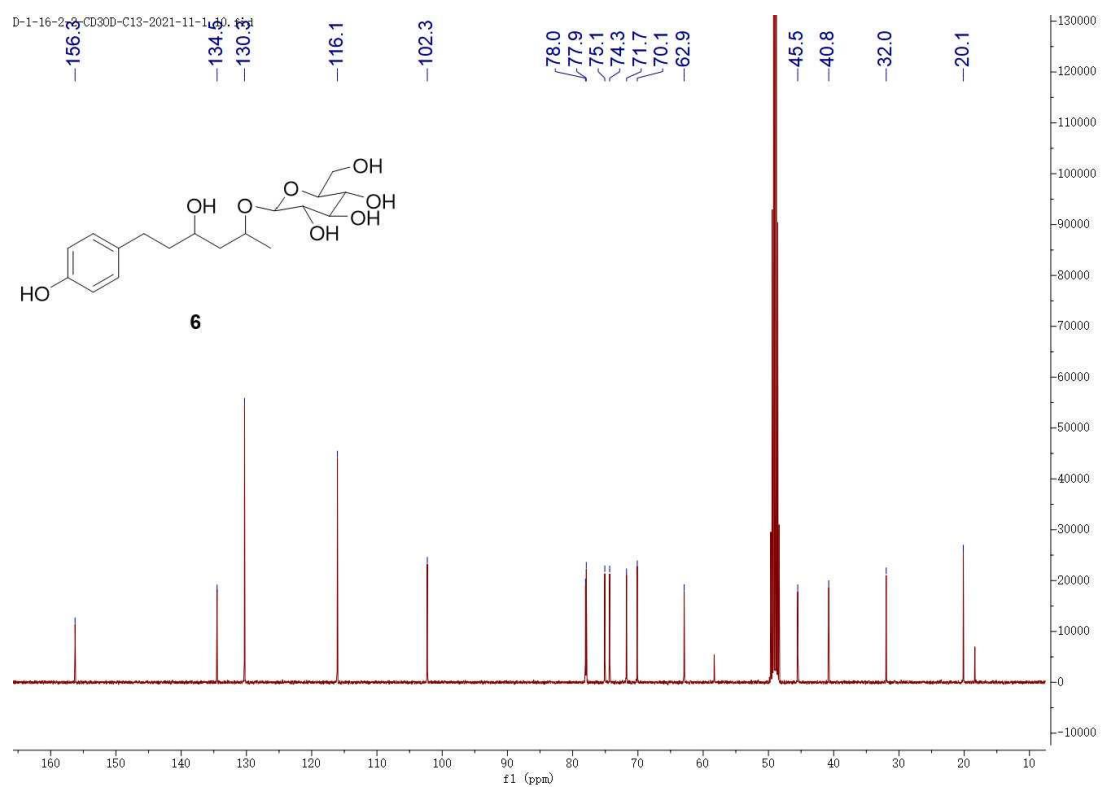

**Figure S6-2.**  $^{13}\text{C}$ -NMR spectrum (100 MHz) of **6** in  $\text{CD}_3\text{OD}$

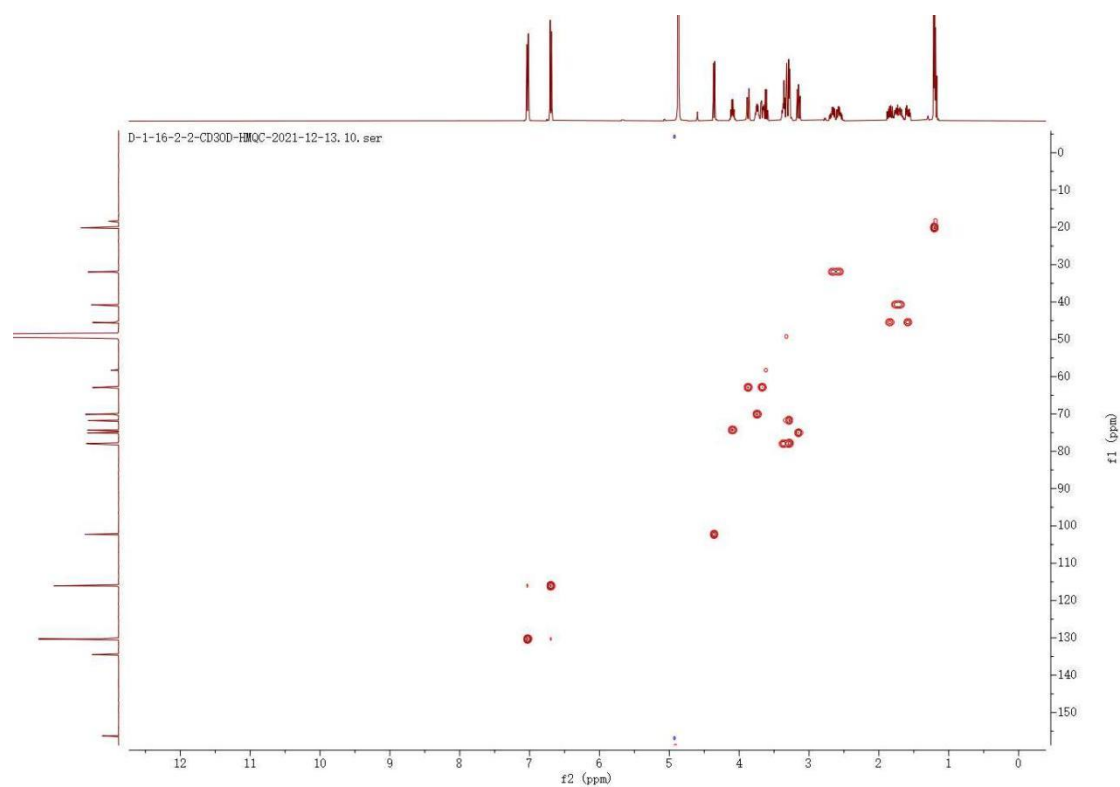

**Figure S6-3.** HMQC spectrum of **6** in  $\text{CD}_3\text{OD}$

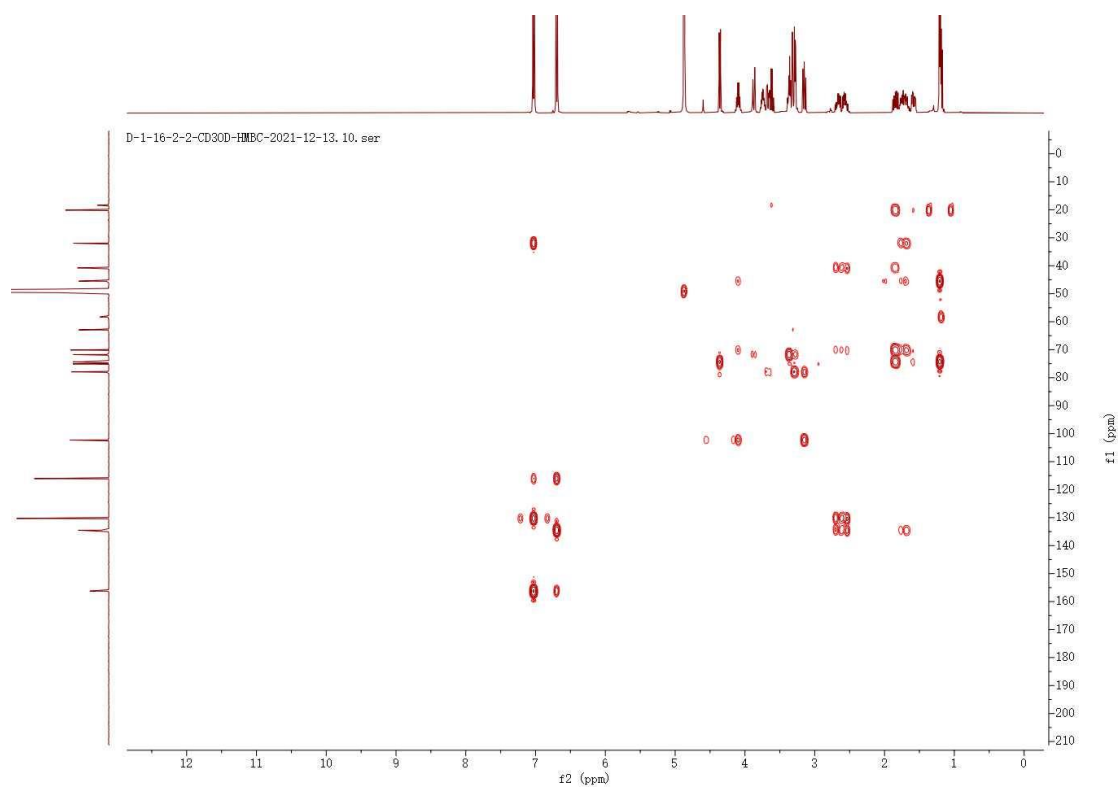

**Figure S6-4.** HMBC spectrum of **6** in CD<sub>3</sub>OD

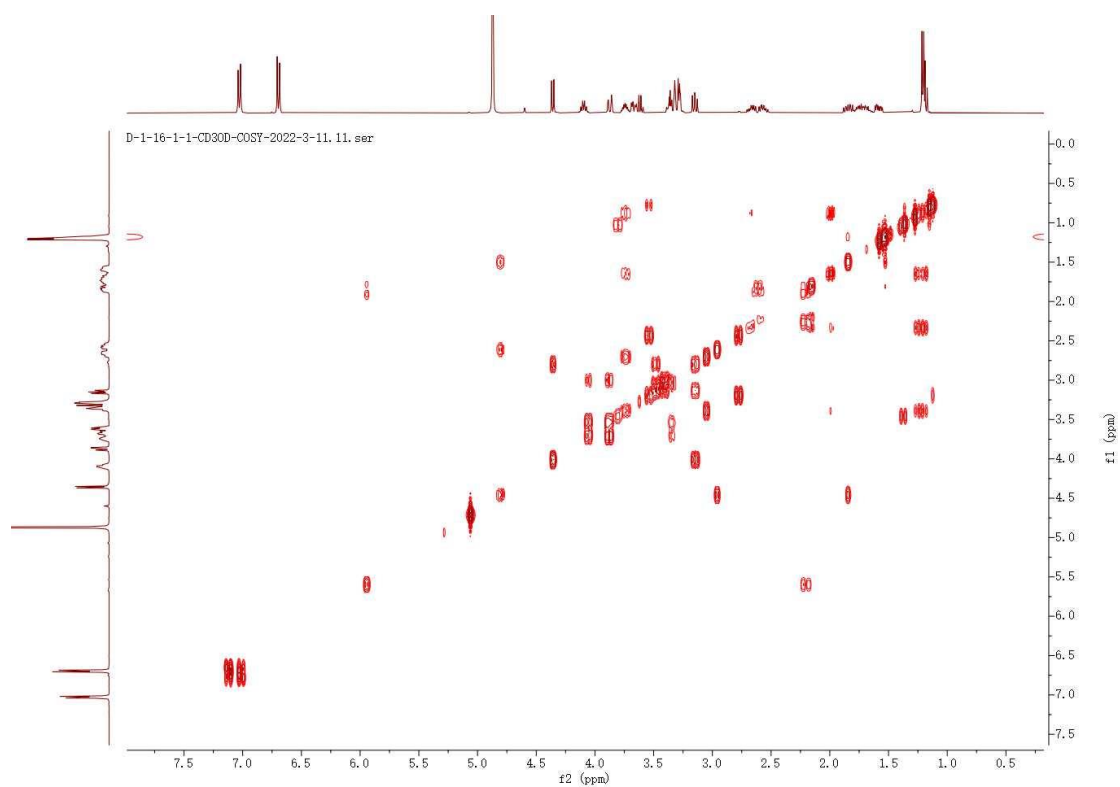

**Figure S6-5.** <sup>1</sup>H-<sup>1</sup>H COSY spectrum of **6** in CD<sub>3</sub>OD

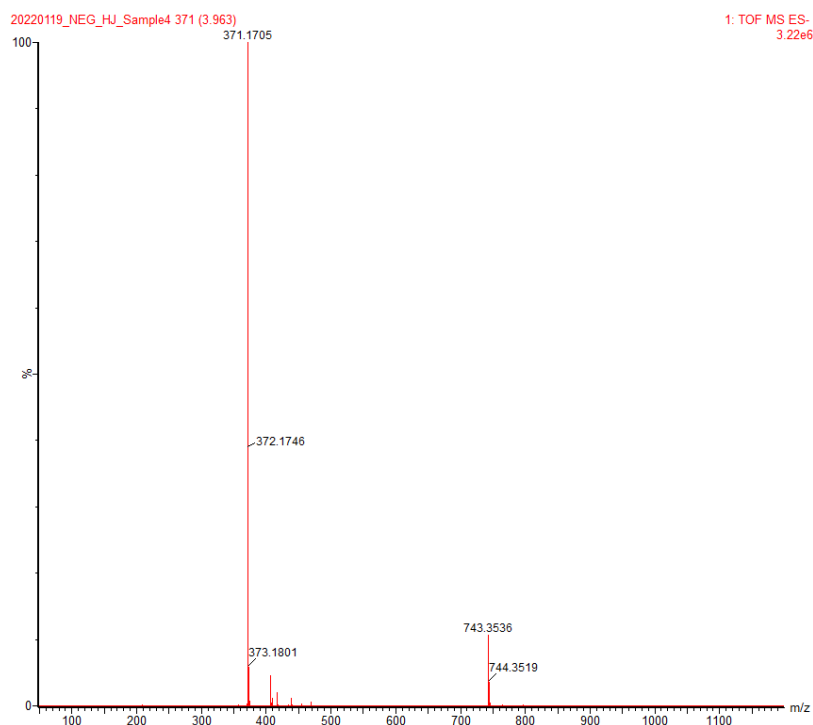

Figure S6-6. HR-ESI-MS spectrum of **6**

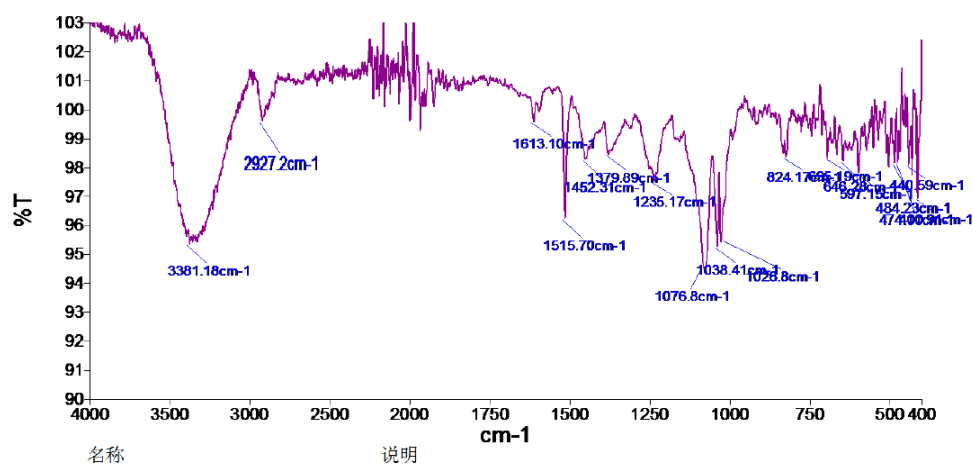

Figure S6-7. IR spectrum of compound **6** (film)

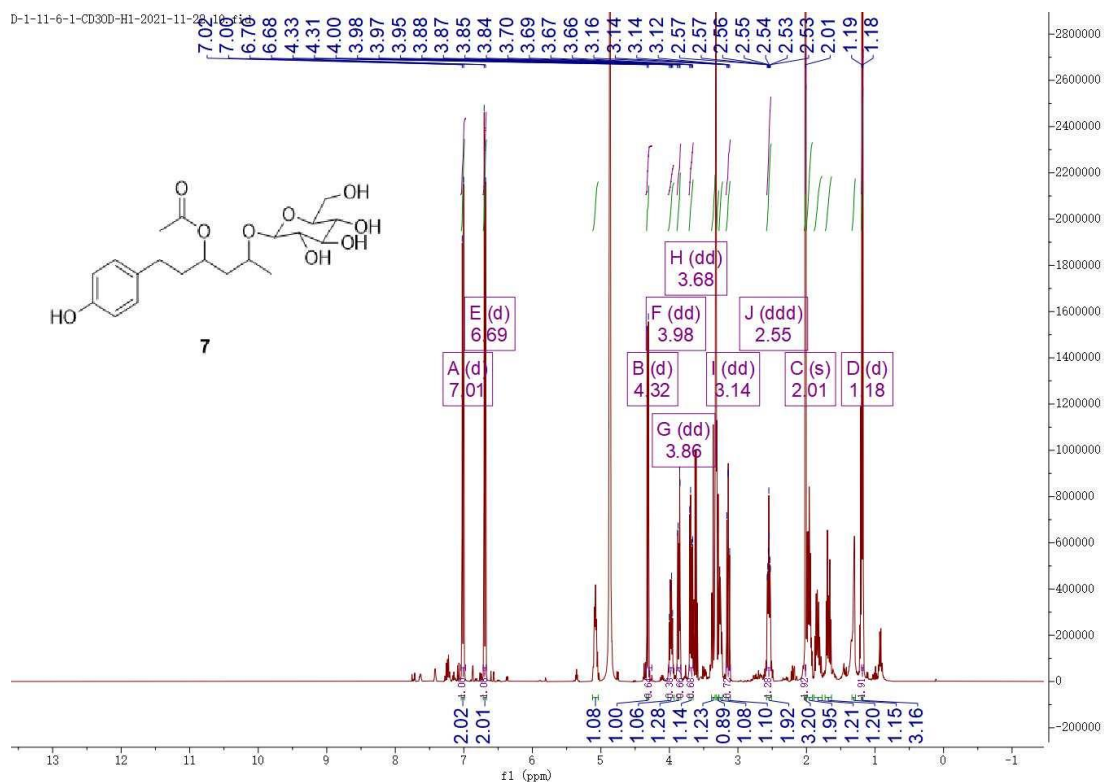

**Figure S7-1.** <sup>1</sup>H-NMR spectrum (400 MHz) of **7** in CD<sub>3</sub>OD

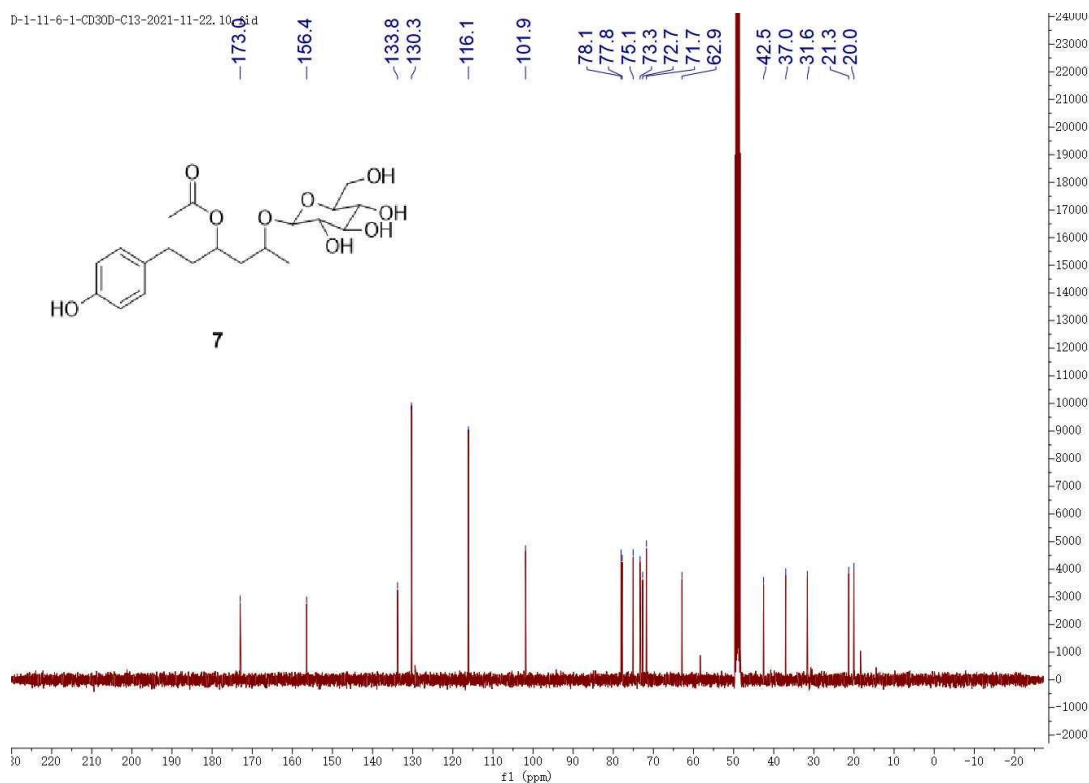

**Figure S7-2.** <sup>13</sup>C-NMR spectrum (100 MHz) of **7** in CD<sub>3</sub>OD

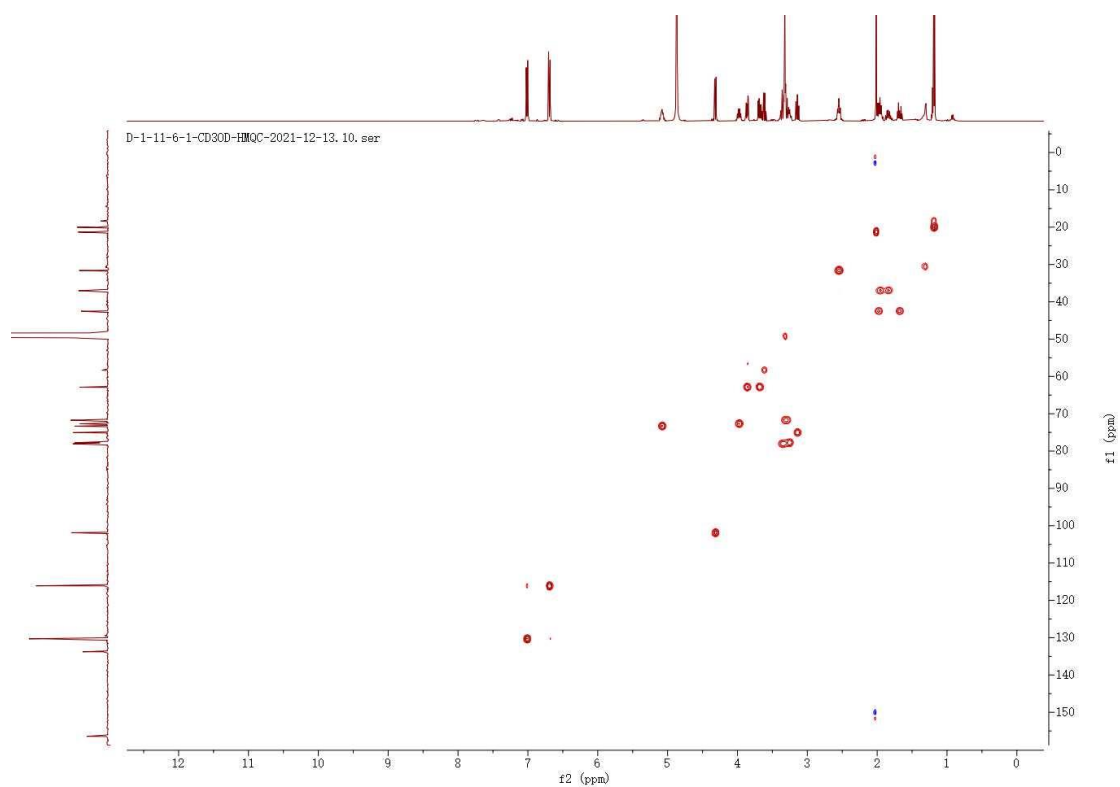

**Figure S7-3.** HMQC spectrum of **7** in CD<sub>3</sub>OD

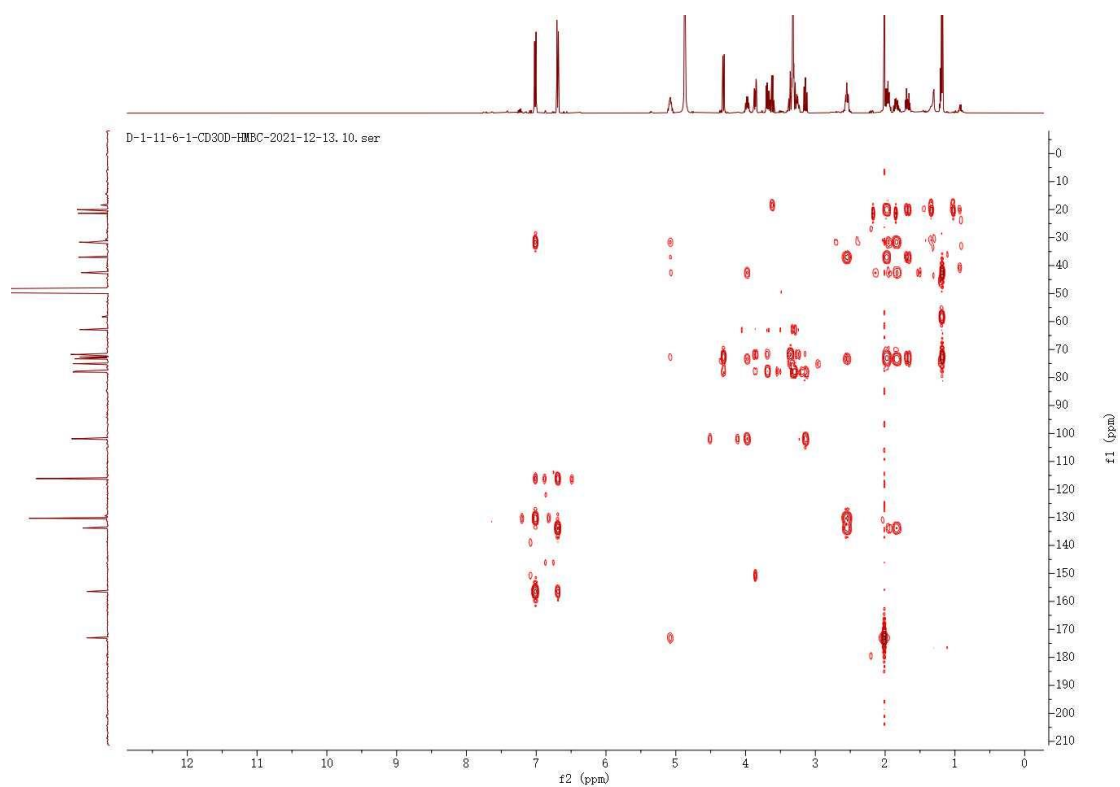

**Figure S7-4.** HMBC spectrum of **7** in CD<sub>3</sub>OD

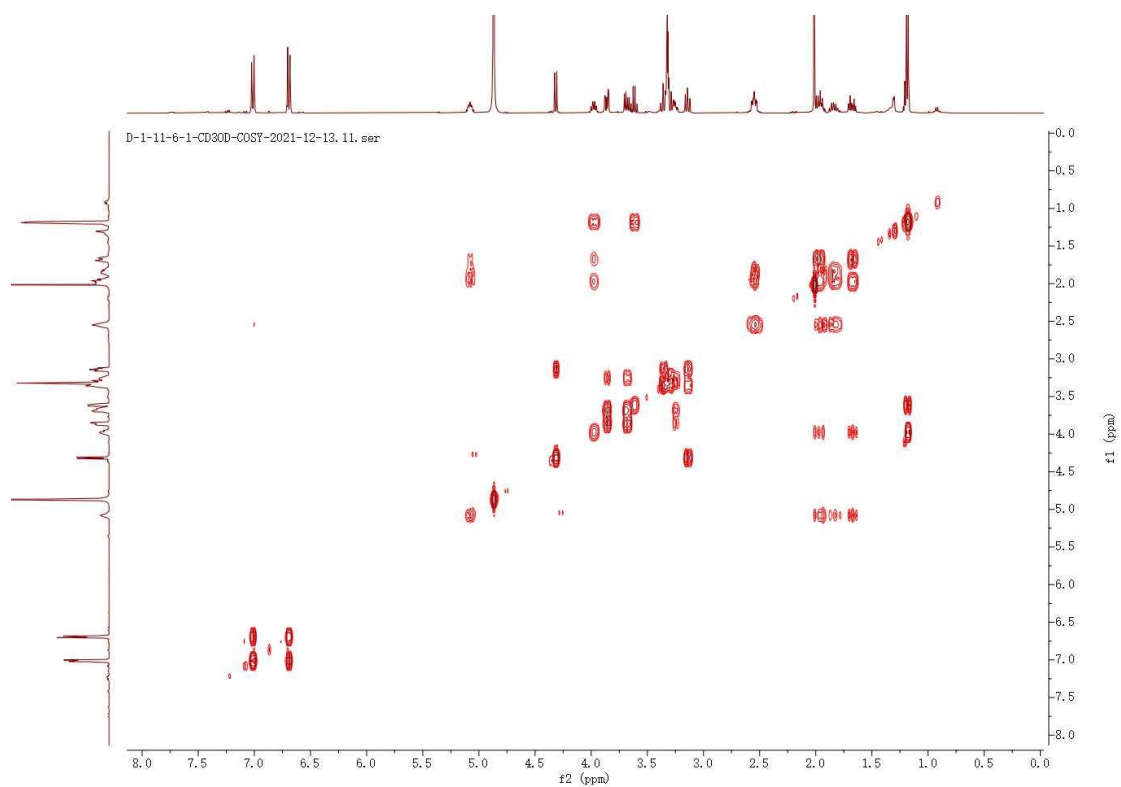

**Figure S7-5.**  $^1\text{H}$ - $^1\text{H}$  COSY spectrum of **7** in  $\text{CD}_3\text{OD}$

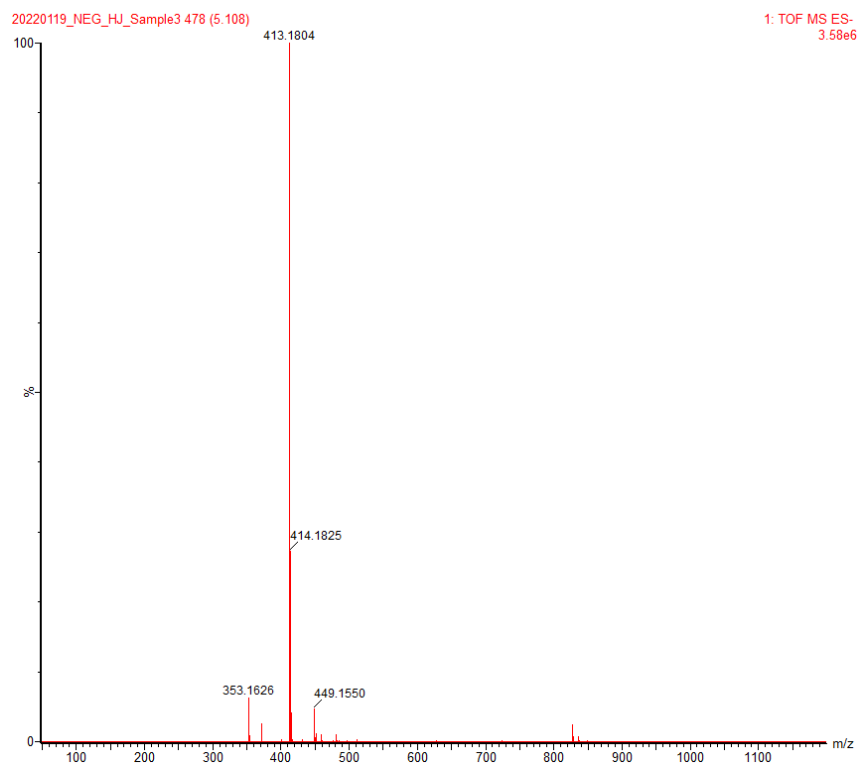

**Figure S7-6.** HR-ESI-MS spectrum of **7**



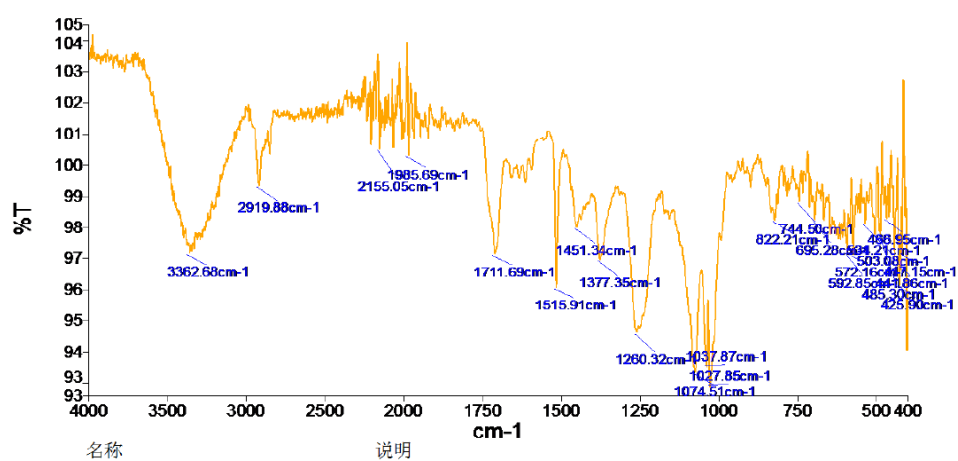

Figure S7-7. IR spectrum of compound **7** (film)
